# Supplementary material for: Inductive Production of the Iron-Chelating 2-Pyridones Benefits the Producing Fungus To Compete for Diverse Niches
Source: PubMed Central journal article supplement (PMC8669486; doi:10.1128/mbio.03279-21), 2021-12-14
Supplement: mbio.03279-21-sd001.pdf [file mbio.03279-21-sd001.pdf]

<sup>1</sup>H (500 MHz) and <sup>13</sup>C (100 MHz) NMR Data for compounds **1** and **1'**. Measured in CD<sub>3</sub>OD.

| Position                    | <b>1 (500 Hz)</b>                             |       | <b>1' (500 Hz)</b>         |       |
|-----------------------------|-----------------------------------------------|-------|----------------------------|-------|
|                             | δH, mult ( <i>J</i> in Hz)                    | δC    | δH, mult ( <i>J</i> in Hz) | δC    |
| 2                           | -                                             | 160.1 | -                          | 160.2 |
| 3                           | -                                             | 108.3 | -                          | 108.3 |
| 4                           | -                                             | 176.6 | -                          | 176.6 |
| 5                           | -                                             | 114.1 | -                          | 115.5 |
| 6                           | 8.10, s                                       | 143.0 | 8.08, s                    | 143.0 |
| 7                           | -                                             | 196.0 | -                          | 195.7 |
| 8                           | 7.97, d (15.5)                                | 124.3 | 7.94, d (15.5)             | 124.3 |
| 9                           | 7.64, d (15.5)                                | 151.6 | 7.61, d (15.5)             | 151.5 |
| 10                          | -                                             | 137.2 | -                          | 137.1 |
| 11                          | 5.91, d (11.5)                                | 147.9 | 5.87, d (10.0)             | 147.9 |
| 12                          | 2.65, m                                       | 45.1  | 2.64, m                    | 45.1  |
| 13                          | 1.66, m; 1.31, m                              | 25.4  | 1.66, m; 1.30, m           | 25.5  |
| 14                          | 0.91, t (7.5)                                 | 12.2  | 0.90, t (7.5)              | 12.1  |
| 15                          | 3.52, m                                       | 66.0  | 3.52, m                    | 66.1  |
| 16                          | 1.96, s                                       | 13.1  | 1.94, s                    | 13.3  |
| 17                          | -                                             | 124.8 | -                          | 124.6 |
| 18/22                       | 7.33, d (8.5)                                 | 131.9 | 7.32, d (8.5)              | 131.7 |
| 19/21                       | 6.83, d (8.5)                                 | 116.3 | 6.82, d (8.5)              | 116.2 |
| 20                          | -                                             | 158.6 | -                          | 158.5 |
| 1'                          | 5.03, d (8.0)                                 | 108.4 | 5.04, d (8.5)              | 108.6 |
| 2'                          | 3.43, m                                       | 73.3  | 3.44, m                    | 73.6  |
| 3'                          | 3.59, m                                       | 77.3  | 3.49, m                    | 77.7  |
| 4'                          | 3.20, t (9.0)                                 | 79.9  | 3.40, m                    | 70.6  |
| 5'                          | 3.49, m                                       | 77.6  | 3.38, m                    | 78.6  |
| 6'                          | 3.81, dd (12.0, 1.5);<br>3.71, dd (12.0, 4.5) | 61.8  | 3.85, m;<br>3.73, m        | 62.2  |
| 4'- OCH <sub>3</sub>        | 3.57, s                                       | 60.8  | -                          | -     |
| <i>N</i> - OCH <sub>3</sub> | -                                             | -     | -                          | -     |

<sup>1</sup>H (400/500 MHz) and <sup>13</sup>C (100 MHz) NMR Data for compounds **2** and **3**. Measured in CD<sub>3</sub>OD.

| Position | <b>2</b>                   |       | <b>3</b>                   |       |
|----------|----------------------------|-------|----------------------------|-------|
|          | δH, mult ( <i>J</i> in Hz) | δC    | δH, mult ( <i>J</i> in Hz) | δC    |
| 2        | -                          | 164.5 | -                          | 160.2 |
| 3        | -                          | 107.7 | -                          | 107.6 |
| 4        | -                          | 178.1 | -                          | 174.3 |
| 5        | -                          | 116.4 | -                          | 114.1 |
| 6        | 7.47, s                    | 140.9 | 7.98, s                    | 140.5 |
| 7        | -                          | 196.1 | -                          | 196.0 |
| 8        | 7.98, d (15.5)             | 125.3 | 8.04, d (15.5)             | 125.2 |
| 9        | 7.59, d (15.5)             | 150.9 | 7.62, d (15.5)             | 151.1 |
| 10       | -                          | 137.2 | -                          | 137.2 |
| 11       | 5.87, d (10.0)             | 147.3 | 5.88, d (11.0)             | 147.5 |
| 12       | 2.65, m                    | 45.1  | 2.65, m                    | 45.1  |
| 13       | 1.66, m; 1.30, m           | 25.5  | 1.67, m; 1.31, m           | 25.5  |
| 14       | 0.90, t (10.0)             | 12.1  | 0.91, t (7.5)              | 12.1  |
| 15       | 3.52, m                    | 66.1  | 3.52, m                    | 66.1  |
| 16       | 1.95, s                    | 13.3  | 1.96, s                    | 13.3  |
| 17       | -                          | 124.7 | -                          | 124.7 |
| 18/22    | 7.29, d (8.5)              | 131.4 | 7.32, d (8.5)              | 131.5 |
| 19/21    | 6.81, d (8.5)              | 116.1 | 6.82, d (8.5)              | 116.2 |
| 20       | -                          | 158.3 | -                          | 158.4 |

<sup>1</sup>H (400/500 MHz) and <sup>13</sup>C (100 MHz) NMR Data for compounds **4**, **5** and **6**. Measured in CD<sub>3</sub>OD.

| Position                    | 4                          |       | 5                          |       | 6                          |       |
|-----------------------------|----------------------------|-------|----------------------------|-------|----------------------------|-------|
|                             | δH, mult ( <i>J</i> in Hz) | δC    | δH, mult ( <i>J</i> in Hz) | δC    | δH, mult ( <i>J</i> in Hz) | δC,   |
| 2                           | -                          | 159.6 | -                          | 159.7 | -                          | 160.4 |
| 3                           | -                          | 108.2 | -                          | 108.4 | -                          | 107.6 |
| 4                           | -                          | 176.1 | -                          | 176.2 | -                          | 174.0 |
| 5                           | -                          | 115.6 | -                          | 115.7 | -                          | 114.3 |
| 6                           | 8.08, s                    | 140.5 | 7.97, s                    | 139.6 | 7.97, s                    | 140.7 |
| 7                           | -                          | 195.7 | -                          | 196.1 | -                          | 196.1 |
| 8                           | 7.99, d (13.2)             | 124.3 | 8.02, d (15.5)             | 127.1 | 8.02, d (15.5)             | 125.1 |
| 9                           | 7.64, d (13.2)             | 151.3 | 7.58, d (15.5)             | 143.0 | 7.58, d (15.5)             | 151.7 |
| 10                          | -                          | 137.2 | -                          | 135.2 | -                          | 134.6 |
| 11                          | 5.90, d (9.2)              | 147.8 | 5.86, d (9.0)              | 145.0 | 5.86, d (9.0)              | 151.3 |
| 12                          | 2.67, m                    | 45.0  | 2.56, m                    | 44.1  | 2.56, m                    | 36.4  |
| 13                          | 1.66, m; 1.33, m           | 25.5  | 1.47, m; 1.36, m           | 25.6  | 1.47, m; 1.36, m           | 31.0  |
| 14                          | 0.91, t (7.6)              | 12.1  | 0.90, t (7.5)              | 12.1  | 0.90, t (7.5)              | 12.5  |
| 15                          | 3.52, m                    | 66.2  | 1.03, d (7.0)              | 66.5  | 1.03, d (7.0)              | 20.5  |
| 16                          | 1.97, s                    | 13.3  | 1.92, s                    | 20.7  | 1.92, s                    | 13.0  |
| 17                          | -                          | 124.7 | -                          | 124.4 | -                          | 124.9 |
| 18/22                       | 7.33, d (8.4)              | 131.5 | 7.32, d (8.5)              | 131.6 | 7.32, d (8.5)              | 131.5 |
| 19/21                       | 6.83, d (8.4)              | 116.3 | 6.82, d (8.5)              | 116.2 | 6.82, d (8.5)              | 116.2 |
| 20                          | -                          | 158.5 | -                          | 158.6 | -                          | 158.5 |
| <i>N</i> - OCH <sub>3</sub> | 4.06, s                    | 65.3  | 4.05, s                    | 65.8  | -                          | -     |

<sup>1</sup>H (400/500 MHz) and <sup>13</sup>C (100 MHz) NMR Data for compounds **7**, **8** and **9**. Measured in CD<sub>3</sub>OD.

| Pos.  | <b>7</b>                                   |            | <b>8</b>                                   |            | <b>9</b>                           |            |
|-------|--------------------------------------------|------------|--------------------------------------------|------------|------------------------------------|------------|
|       | $\delta$ H, mult ( <i>J</i> in Hz)         | $\delta$ C | $\delta$ H, mult ( <i>J</i> in Hz)         | $\delta$ C | $\delta$ H, mult ( <i>J</i> in Hz) | $\delta$ C |
| 2     | -                                          | 176.5      | -                                          | 176.7      | -                                  | 176.6      |
| 3     | -                                          | 101.5      | -                                          | 101.2      | -                                  | 101.3      |
| 4     | -                                          | 197.6      | -                                          | 197.4      | -                                  | 197.2      |
| 5     | 4.05, s                                    | 64.3       | 4.07, s                                    | 64.3       | 4.04, s                            | 64.4       |
| 6     | -                                          | 176.0      |                                            | 176.0      | -                                  | 175.8      |
| 7     | 7.05, d (15.6)                             | 116.9      | 7.08, d (15.5)                             | 117.0      | 7.08, d (15.6)                     | 116.9      |
| 8     | 7.46, d (15.6)                             | 151.0      | 7.49, d (15.5)                             | 151.0      | 7.49, d (15.6)                     | 150.9      |
| 9     | -                                          | 135.0      | -                                          | 134.5      | -                                  | 136.7      |
| 10    | 5.93, d (10.0)                             | 149.4      | 5.88, d (9.5)                              | 152.5      | 5.88, d (10.0)                     | 148.7      |
| 11    | 2.61, m                                    | 42.4       | 2.79, m                                    | 31.3       | 2.63, m                            | 45.1       |
| 12    | 3.60, m                                    | 72.1       | 1.55, m; 1.64, m                           | 40.0       | 1.55, m; 1.62, m                   | 25.4       |
| 13    | 1.12, d (6.4)                              | 21.3       | 3.48, m; 3.53, m                           | 60.7       | 0.87, t (10.0)                     | 12.0       |
| 14    | 1.05, d (6.4)                              | 16.5       | 1.04, d (11.0)                             | 20.3       | 3.47, m; 3.54, m                   | 65.9       |
| 15    | 1.87, s                                    | 12.7       | 1.89, s                                    | 12.4       | 1.91, s                            | 12.9       |
| 16    | 2.82, dd(14.0, 6.4)<br>2.99, dd(14.0, 2.0) | 37.6       | 2.80, dd(14.0, 6.0)<br>2.86, dd(14.0, 4.0) | 37.3       | 2.84, m<br>3.01, dd (11.2, 3.2)    | 37.5       |
| 17    | -                                          | 127.0      | -                                          | 127.8      | -                                  | 127.9      |
| 18/22 | 6.98, d (8.4)                              | 131.7      | 6.99, d (8.0)                              | 131.7      | 6.99, d (8.0)                      | 131.7      |
| 19/21 | 6.68, d (8.4)                              | 116.1      | 6.67, d (8.0)                              | 116.1      | 6.67, d (8.0)                      | 116.1      |
| 20    | -                                          | 157.0      | -                                          | 157.1      | -                                  | 157.4      |

<sup>1</sup>H (500 MHz) and <sup>13</sup>C (100 MHz) NMR Data for **farinosone B**. Measured in CD<sub>3</sub>OD.

| Position | Farinosone B                       |            |
|----------|------------------------------------|------------|
|          | $\delta$ H, mult ( <i>J</i> in Hz) | $\delta$ C |
| 2        | -                                  | 159.9      |
| 3        | -                                  | 107.6      |
| 4        | -                                  | 174.5      |
| 5        | -                                  | 114.2      |
| 6        | 7.94, s                            | 140.1      |
| 7        | -                                  | 195.0      |
| 8        | 7.98, d (15.0)                     | 124.7      |
| 9        | 7.63, dd (12.0, 14.5)              | 145.6      |
| 10       | 6.54, m                            | 131.4      |
| 11       | 6.82, m                            | 144.8      |
| 12       | 6.37, dd (11.0, 15.0)              | 128.6      |
| 13       | 6.51, m                            | 147.0      |
| 14       | -                                  | 134.5      |
| 15       | 5.46, d (10.0)                     | 144.7      |
| 16       | 2.47, m                            | 35.7       |
| 17       | 1.43, m; 1.30, m                   | 12.4       |
| 18       | 0.87, t (7.5)                      | 20.8       |
| 19       | 0.99, d (6.5)                      | 12.8       |
| 20       | 1.82, s                            | 158.5      |
| 21       | -                                  | 127.3      |
| 22/26    | 7.31, d (9.0)                      | 131.5      |
| 23/25    | 6.82, d (9.0)                      | 116.2      |
| 24       | -                                  | 158.4      |

<sup>1</sup>H (400/500 MHz) and <sup>13</sup>C (100 MHz) NMR Data for compounds **10**, **11** and **12**. Measured in CD<sub>3</sub>OD.

| Pos.      | <b>10</b>                                    |            | <b>11</b>                                    |            | <b>12</b>                          |            |
|-----------|----------------------------------------------|------------|----------------------------------------------|------------|------------------------------------|------------|
|           | $\delta$ H, mult ( <i>J</i> in Hz)           | $\delta$ C | $\delta$ H, mult ( <i>J</i> in Hz)           | $\delta$ C | $\delta$ H, mult ( <i>J</i> in Hz) | $\delta$ C |
| 2         | -                                            | 176.5      | -                                            | 176.5      | -                                  | 176.1      |
| 3         | -                                            | 102.1      | -                                            | 104.7      | -                                  | 104.5      |
| 4         | -                                            | 197.6      | -                                            | 197.8      | -                                  | 198.0      |
| 5         | 4.09, s                                      | 64.0       | 4.10, s                                      | 64.2       | 4.25, s                            | 68.6       |
| 6         | -                                            | 176.0      | -                                            | 175.7      | -                                  | 176.0      |
| 7         | 7.16, d (15.5)                               | 117.3      | 7.17, d (15.5)                               | 118.4      | 6.99, d (15.5)                     | 116.7      |
| 8         | 7.49, d (15.5)                               | 151.9      | 7.49, d (15.5)                               | 149.4      | 7.45, d (15.5)                     | 151.1      |
| 9         | -                                            | 136.0      | -                                            | 137.0      | -                                  | 134.3      |
| 10        | 6.06, s                                      | 151.6      | 5.96, d (9.5)                                | 143.3      | 5.85, d (9.5)                      | 153.2      |
| 11        | -                                            | 74.3       | 3.73, m                                      | 47.6       | 2.53, m                            | 36.5       |
| 12        | 1.68, m                                      | 36.9       | -                                            | 210.5      | 1.33, m; 1.45, m                   | 31.0       |
| 13        | 0.94, t (7.5)                                | 8.7        | 2.15, s                                      | 28.5       | 0.87, t (7.5)                      | 12.3       |
| 14        | 1.36, s                                      | 28.3       | 1.20, d (7.0)                                | 16.4       | 1.00, d (7.0)                      | 20.2       |
| 15        | 2.11, s                                      | 13.0       | 1.97, s                                      | 12.6       | 1.86, s                            | 12.5       |
| 16        | 2.88, dd (14.5, 5.0)<br>3.01, dd (14.5, 3.5) | 37.6       | 2.87, dd (14.0, 6.0)<br>3.00, dd (14.0, 4.5) | 37.5       | 5.00, d (3.5)                      | 74.8       |
| 17        | -                                            | 127.8      | -                                            | 127.7      | -                                  | 130.6      |
| 18/<br>22 | 6.99, d (8.0)                                | 131.7      | 6.99, d (8.0)                                | 131.7      | 7.13, d (8.5)                      | 129.6      |
| 19/<br>21 | 6.67, d (8.0)                                | 116.1      | 6.66, d (8.0)                                | 116.1      | 6.68, d (8.5)                      | 115.6      |
| 20        | -                                            | 157.3      | -                                            | 157.3      | -                                  | 158.2      |

<sup>1</sup>H (500 MHz) and <sup>13</sup>C (100 MHz) NMR Data for compound **13**. Measured in CD<sub>3</sub>OD.

| Position                    | <b>13</b>                          |            |
|-----------------------------|------------------------------------|------------|
|                             | $\delta$ H, mult ( <i>J</i> in Hz) | $\delta$ C |
| 2                           | -                                  | 159.5      |
| 3                           | -                                  | 108.6      |
| 4                           | -                                  | 175.2      |
| 5                           | -                                  | 115.4      |
| 6                           | 8.13, s                            | 141.3      |
| 7                           | -                                  | 206.3      |
| 8                           | 3.66, m; 3.55, m                   | 66.2       |
| 9                           | 4.66, t (11.0)                     | 74.4       |
| 10                          | -                                  | 135.9      |
| 11                          | 5.60, d (10.0)                     | 126.7      |
| 12                          | 2.05, m                            | 37.7       |
| 13                          | 1.32, m                            | 26.6       |
| 14                          | 0.96, t (7.0)                      | 11.6       |
| 15                          | 1.76, s                            | 19.6       |
| 16                          | -                                  | 124.2      |
| 17/21                       | 7.34, d (7.5)                      | 131.6      |
| 18/20                       | 6.84, d (7.5)                      | 116.2      |
| 19                          |                                    | 158.6      |
| <i>N</i> - OCH <sub>3</sub> | 4.07, s                            | 65.8       |
