# Supplementary material for: Inductive Production of the Iron-Chelating 2-Pyridones Benefits the Producing Fungus To Compete for Diverse Niches
Source: PubMed Central journal article supplement (PMC8669486; doi:10.1128/mbio.03279-21), 2021-12-14
Supplement: mbio.03279-21-sd002.pdf [file mbio.03279-21-sd002.pdf]

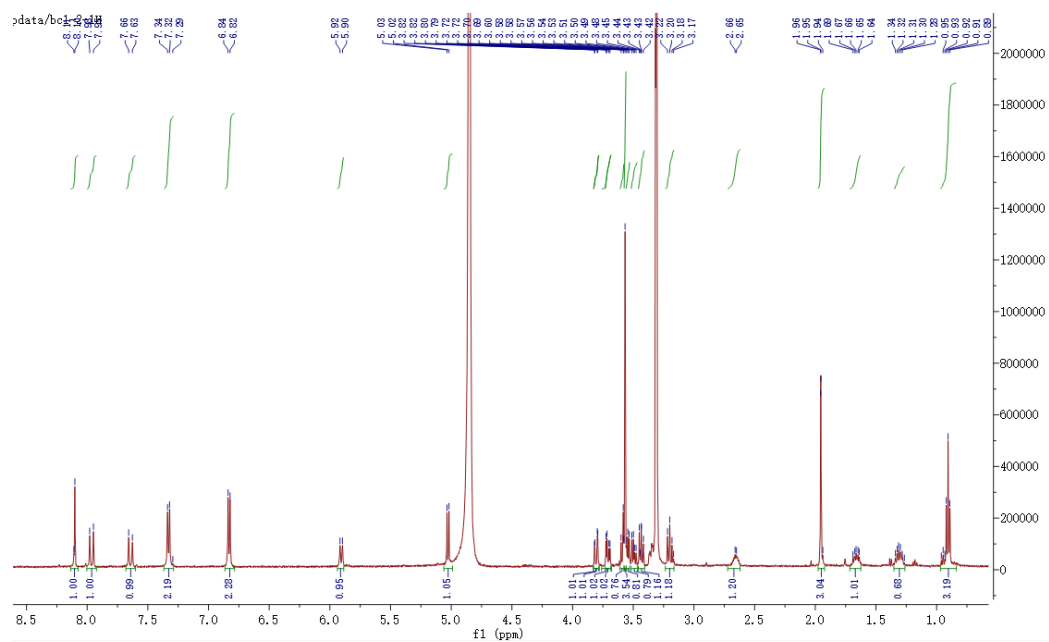

$^1\text{H}$  NMR spectrum of Pyridovericin-*N*-*O*-(4-*O*-methyl- $\beta$ -*D*-glucopyranoside) (**1**) (500 Hz,  $\text{CD}_3\text{OD}-d_4$ ).

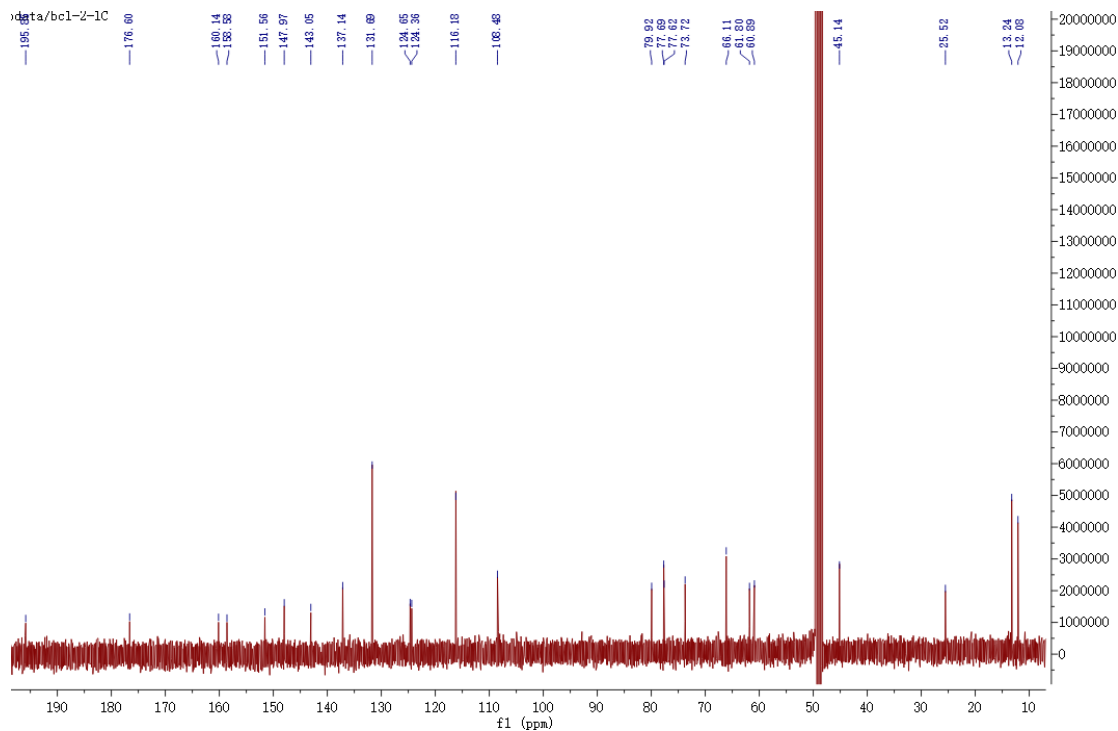

$^{13}\text{C}$  NMR spectrum of Pyridovericin-*N*-*O*-(4-*O*-methyl- $\beta$ -*D*-glucopyranoside) (**1**) (100 Hz,  $\text{CD}_3\text{OD}-d_4$ ).

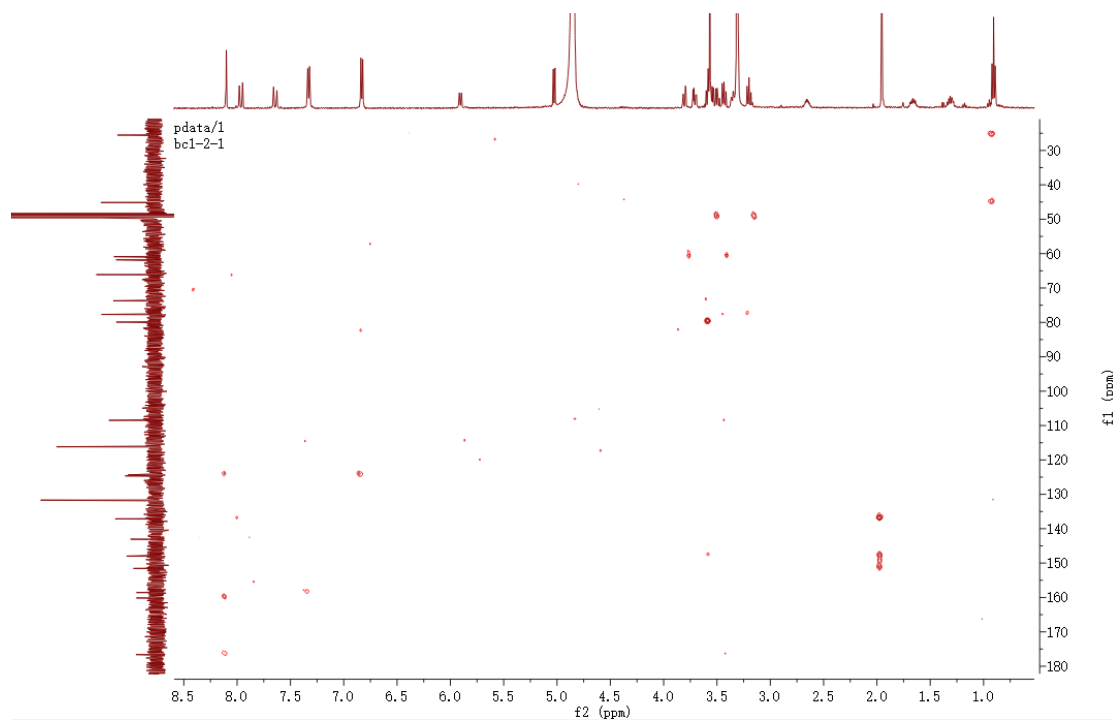

HMBC spectrum of Pyridovericin-*N*-*O*-(4-*O*-methyl- $\beta$ -D-glucopyranoside) (**1**).

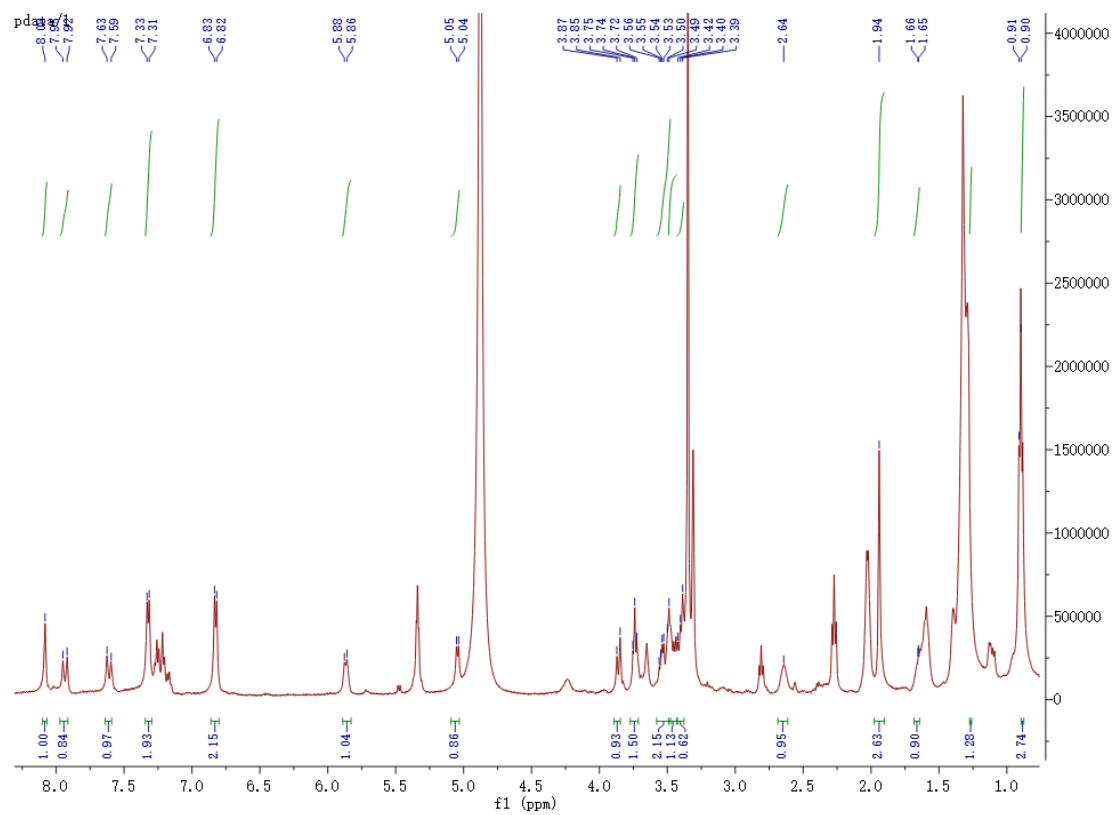

$^1\text{H}$  NMR spectrum of Pyridovericin-*N*-*O*-( $\beta$ -D-glucopyranoside) (**1'**) (500 Hz,  $\text{CD}_3\text{OD}-d_4$ ).

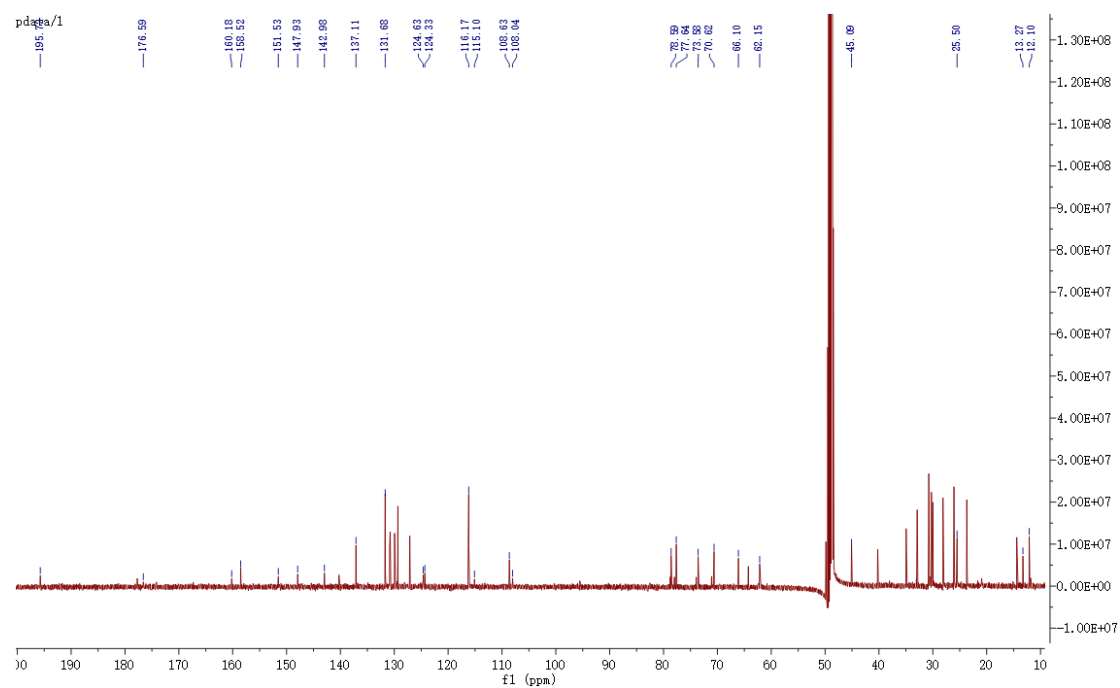

$^{13}\text{C}$  NMR spectrum of Pyridovericin-*N*-*O*-( $\beta$ - $\text{D}$ -glucopyranoside) (**1'**) (100 Hz,  $\text{CD}_3\text{OD}-d_4$ ).

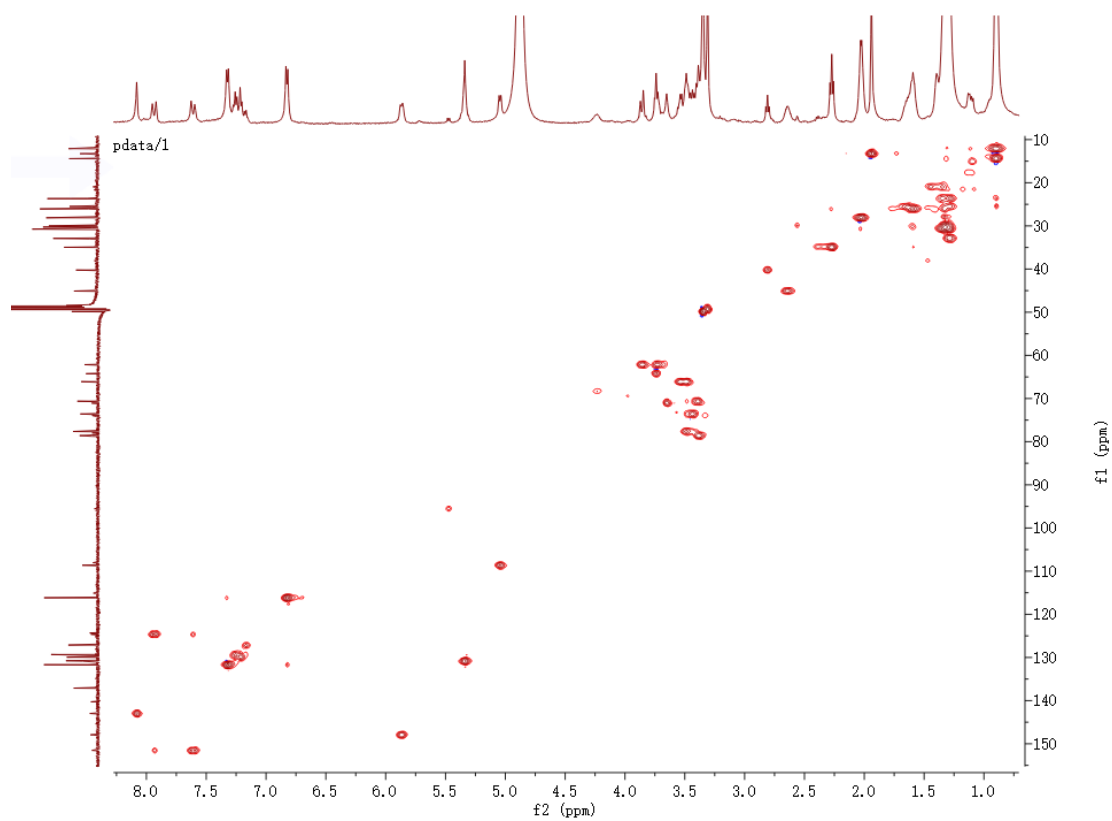

HSQC spectrum of Pyridovericin-*N*-*O*-( $\beta$ - $\text{D}$ -glucopyranoside) (**1'**).

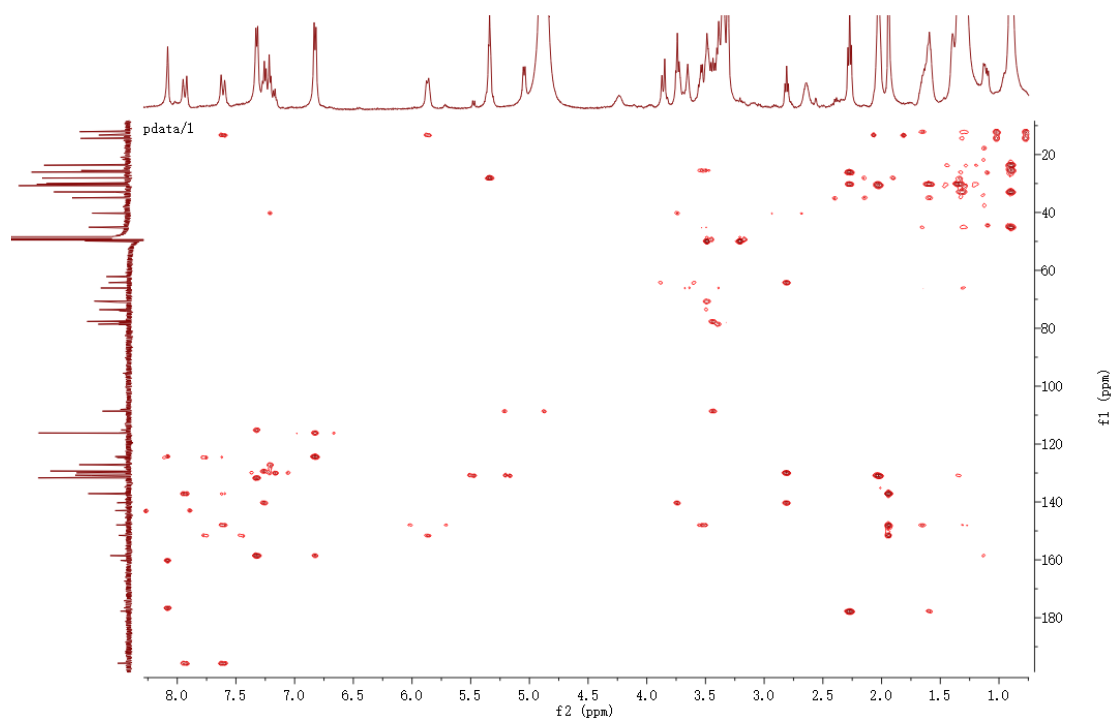

HMBC spectrum of Pyridovericin-*N*-*O*-( $\beta$ -D-glucopyranoside) (**1'**).

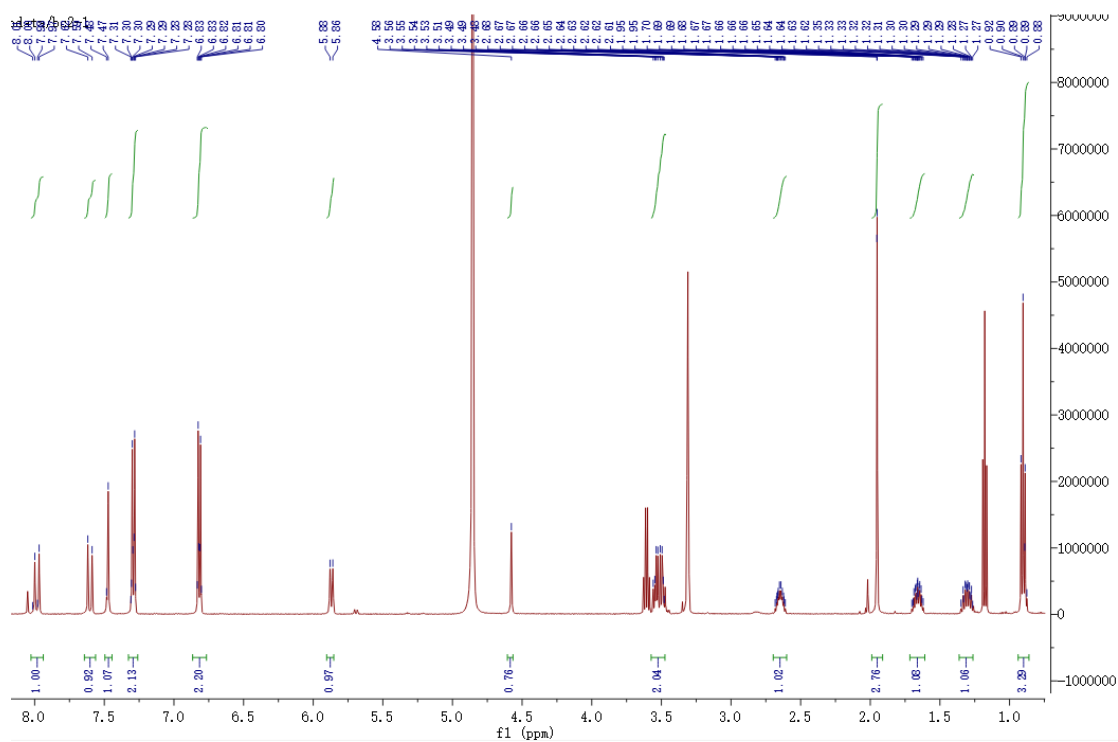

$^1\text{H}$  NMR spectrum of pyridovericin (**2**) (500 Hz,  $\text{CD}_3\text{OD}-d_4$ ).

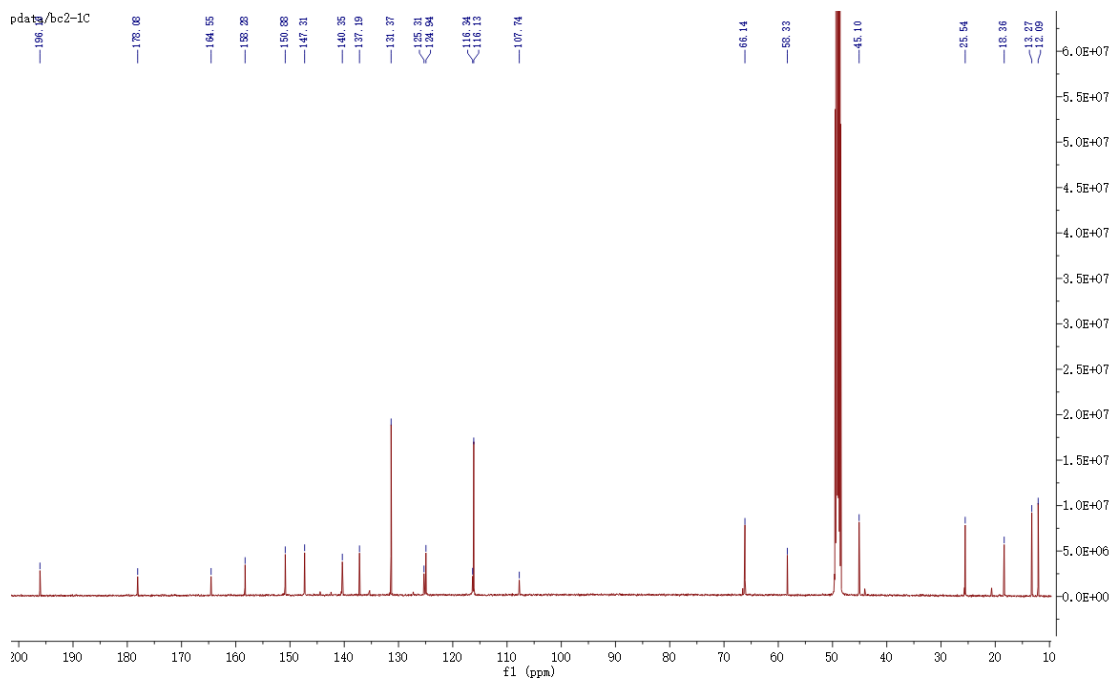

<sup>13</sup>C NMR spectrum of pyridovericin (2) (100 Hz, CD3OD-d<sub>4</sub>).

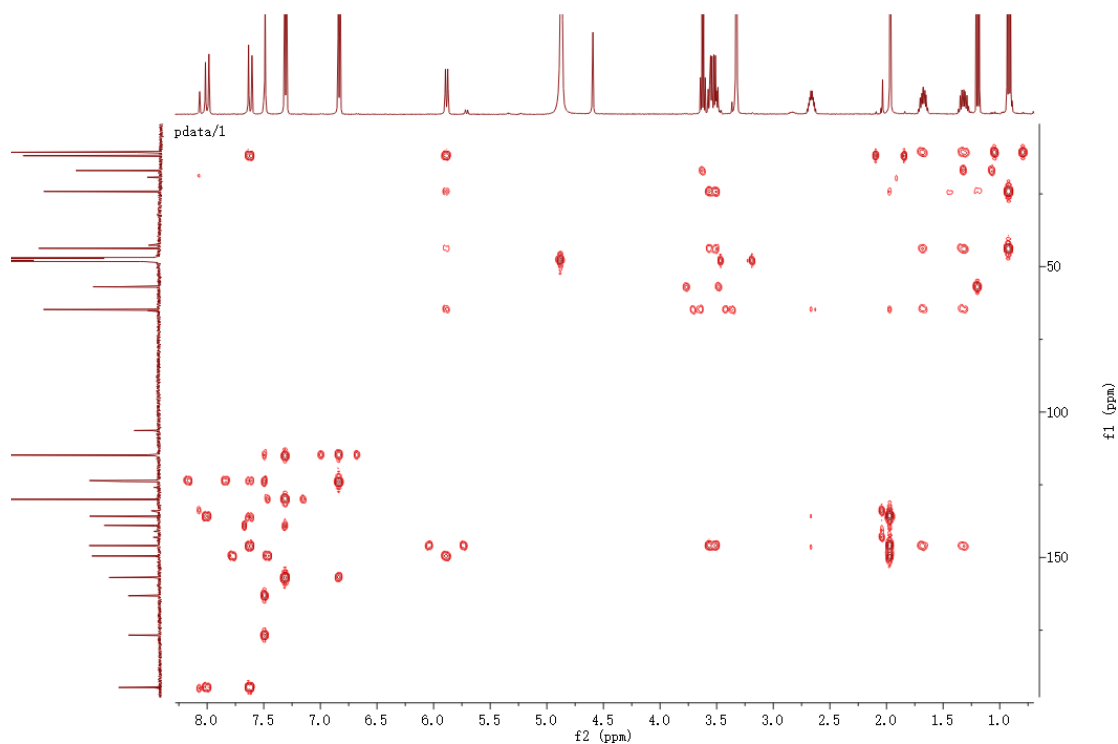

HMBC spectrum of pyridovericin (2).

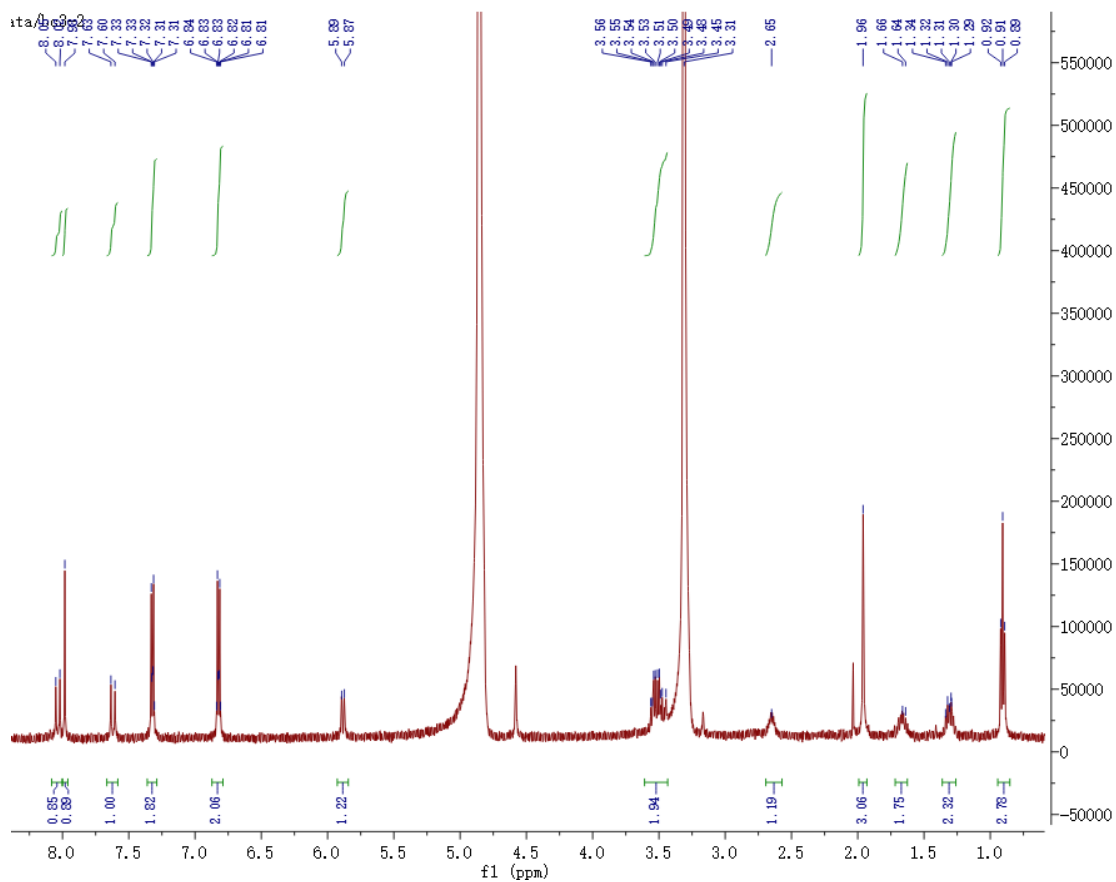

$^1\text{H}$  NMR spectrum of 15-hydroxytenellin (**3**) (500 Hz,  $\text{CD}_3\text{OD}-d_4$ ).

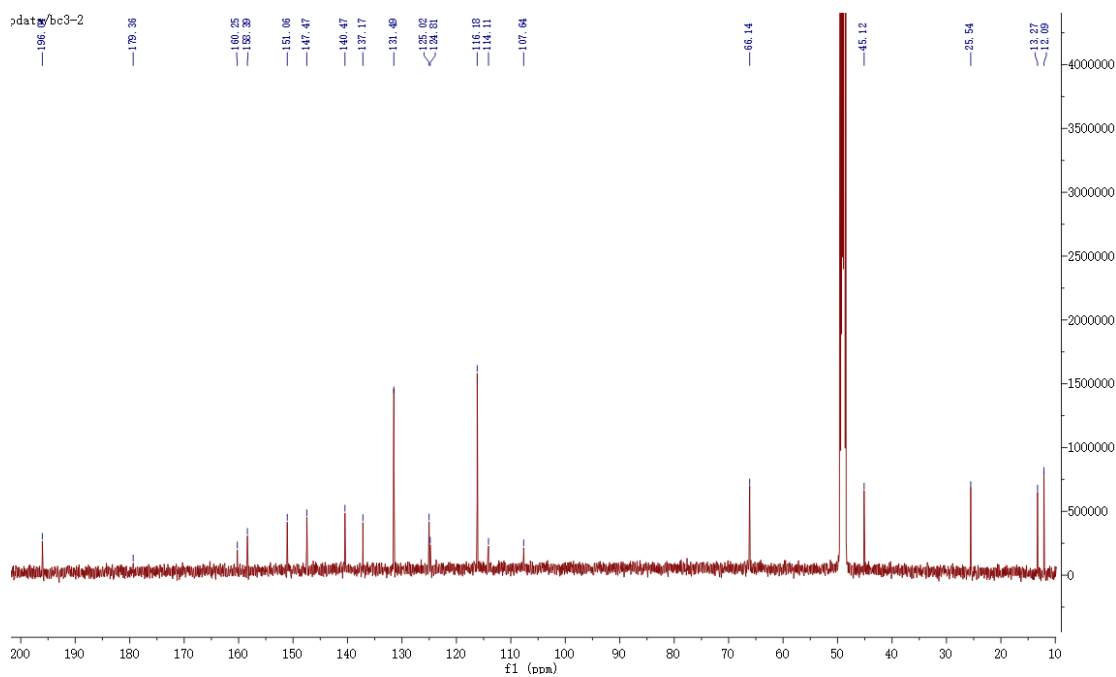

$^{13}\text{C}$  NMR spectrum of 15-hydroxytenellin (**3**) (100 Hz,  $\text{CD}_3\text{OD}-d_4$ ).

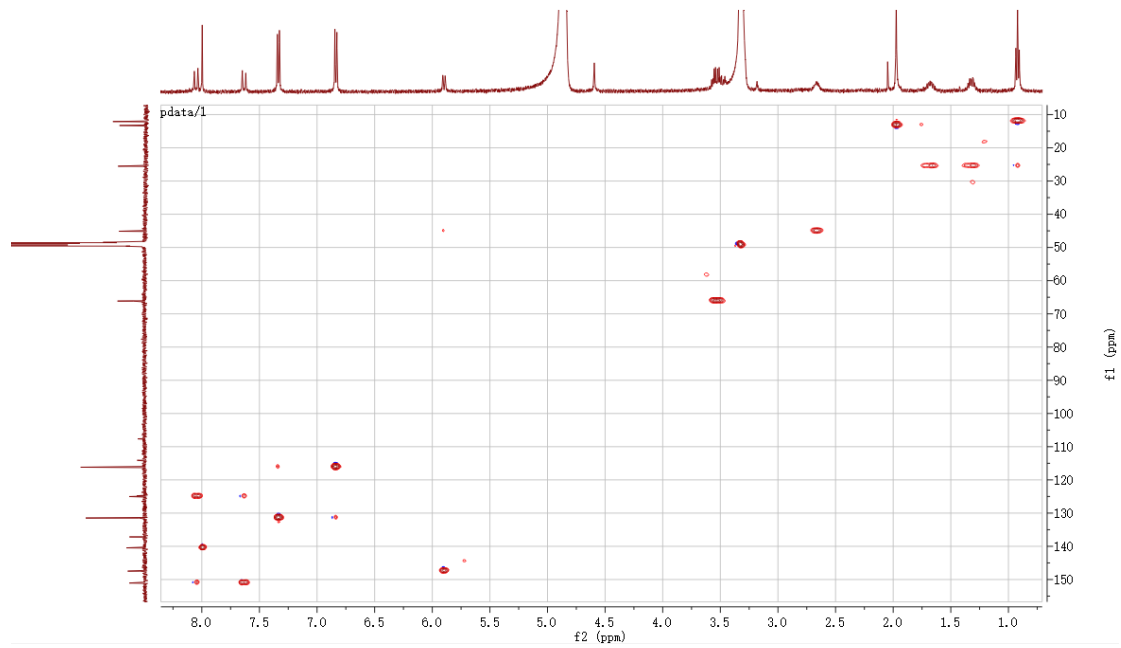

HSQC spectrum of 15-hydroxytenellin (3).

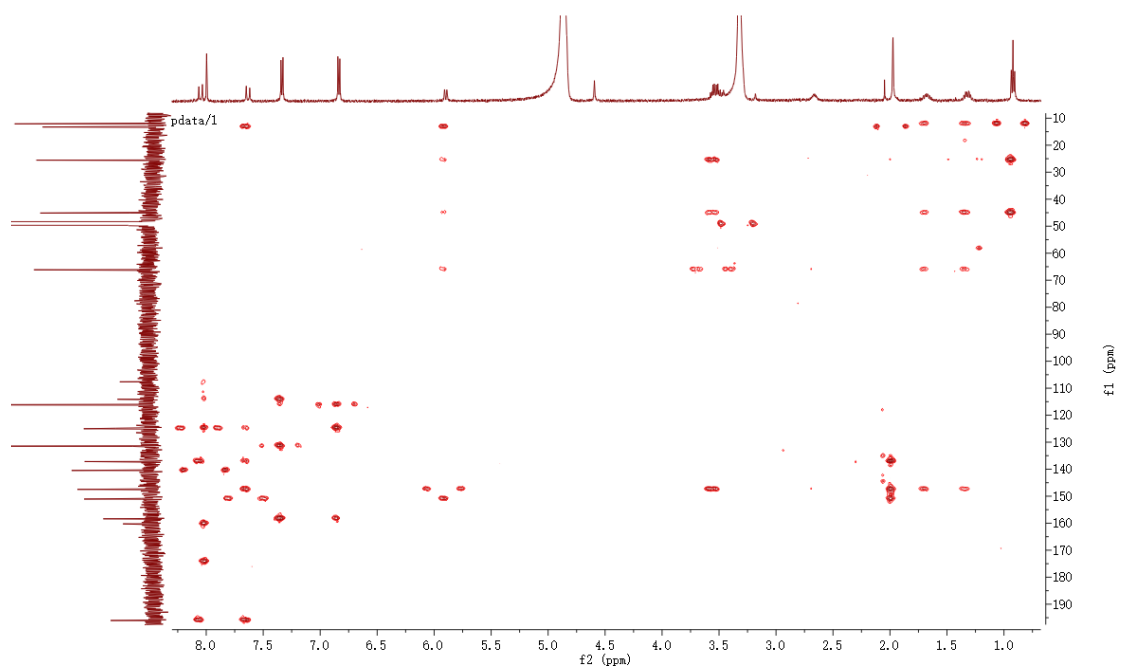

HMBC spectrum of 15-hydroxytenellin (3).

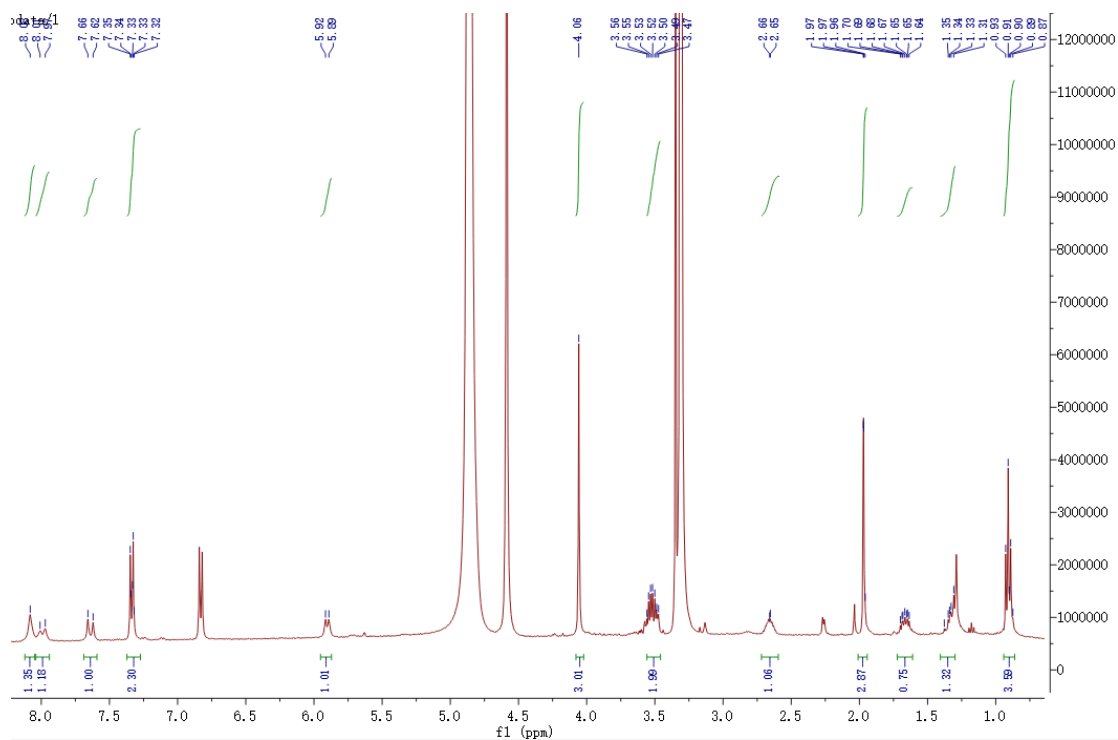

<sup>1</sup>H NMR spectrum of 1-O-methyl-15-hydroxytenellin (**4**) (400 Hz, CD<sub>3</sub>OD-*d*<sub>4</sub>).

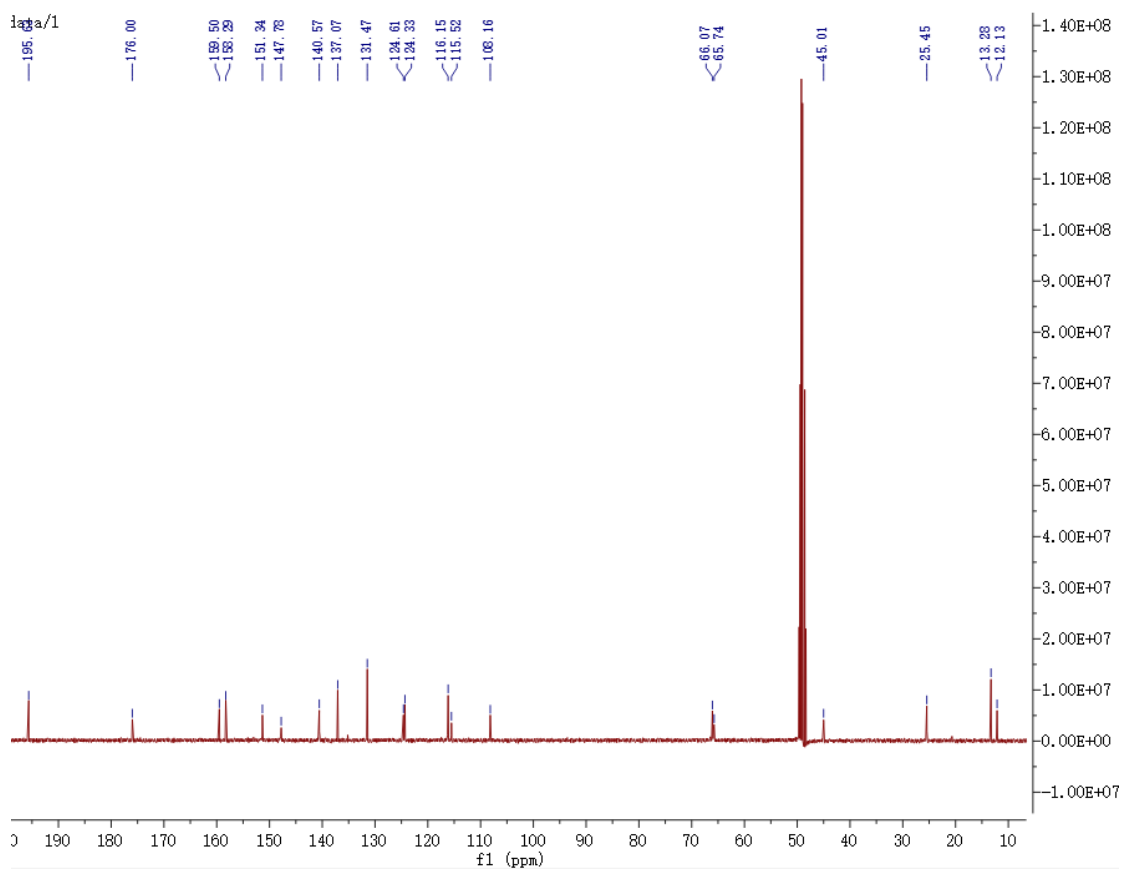

<sup>13</sup>C NMR spectrum of 1-O-methyl-15-hydroxytenellin (**4**) (100 Hz, CD<sub>3</sub>OD-*d*<sub>4</sub>).



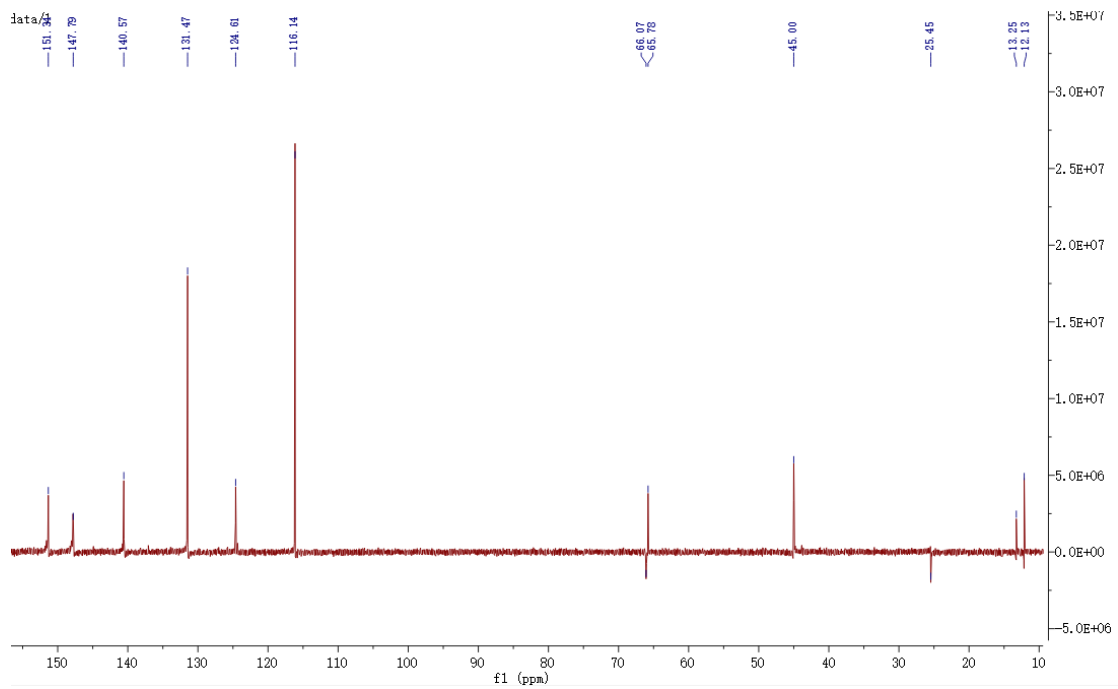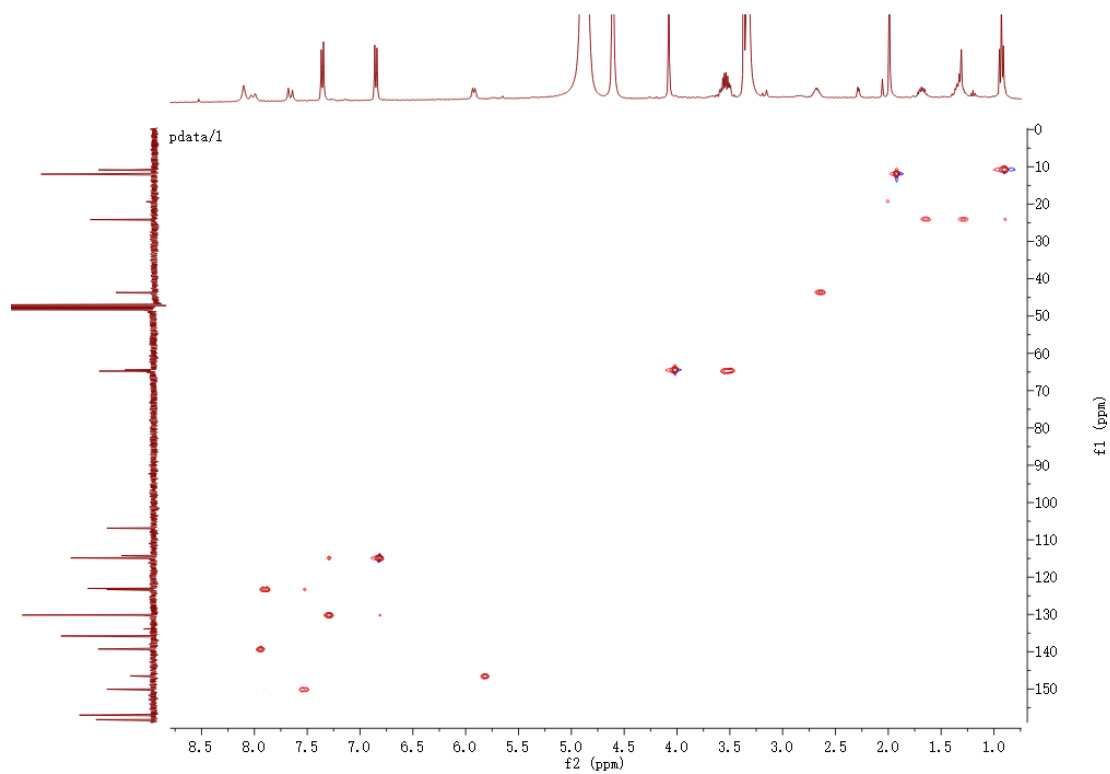

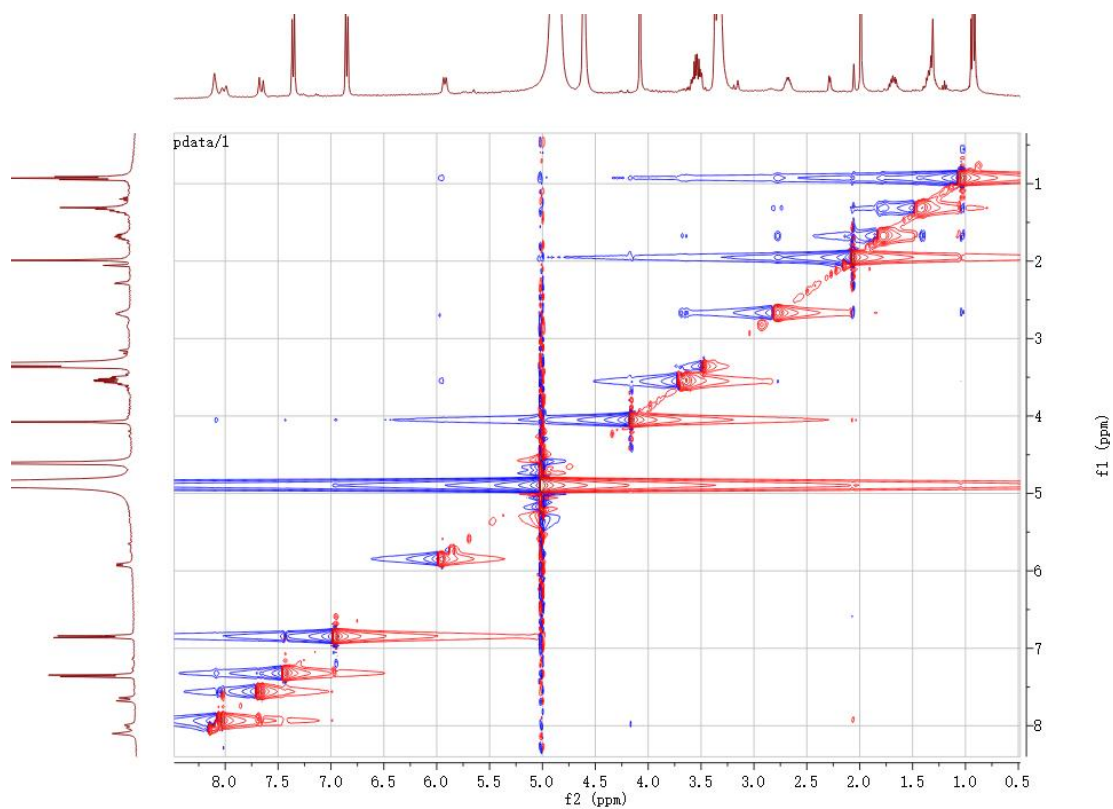

$^1\text{H}$ - $^1\text{H}$  NOESY spectrum of 1-O-methyl-15-hydroxytenellin (**4**).

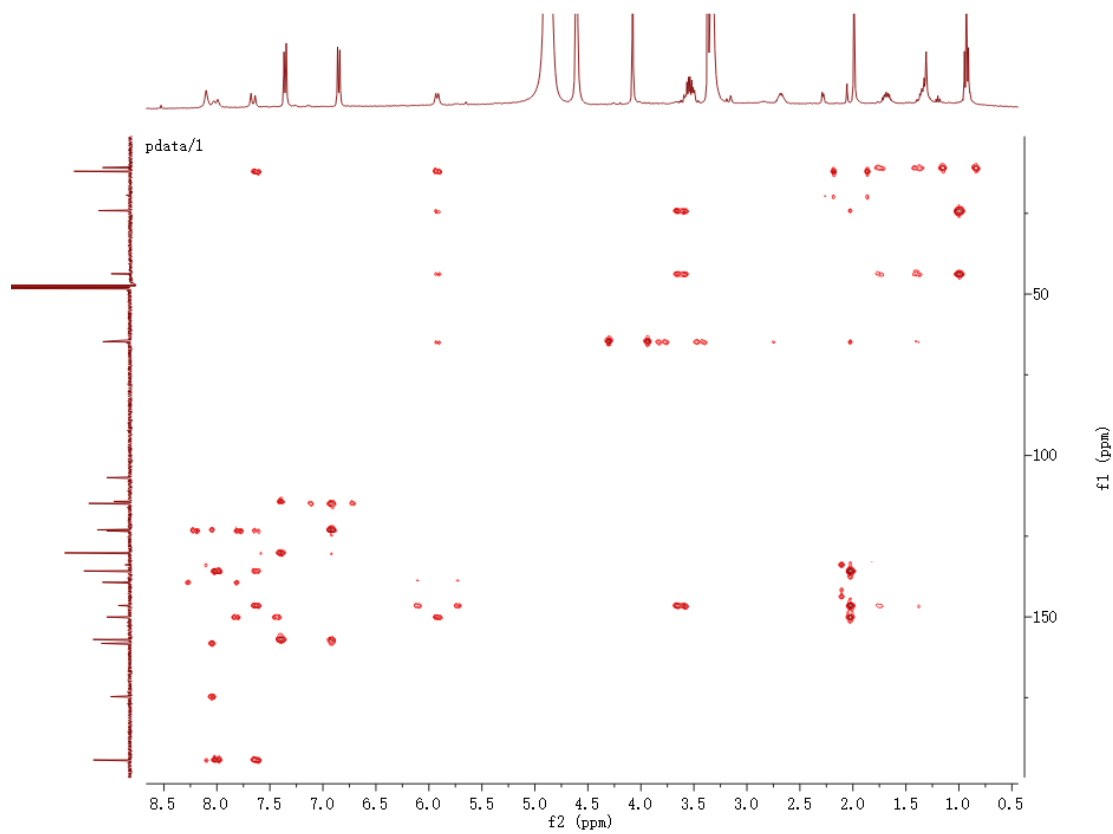

HMBC spectrum of 1-O-methyl-15-hydroxytenellin (**4**).

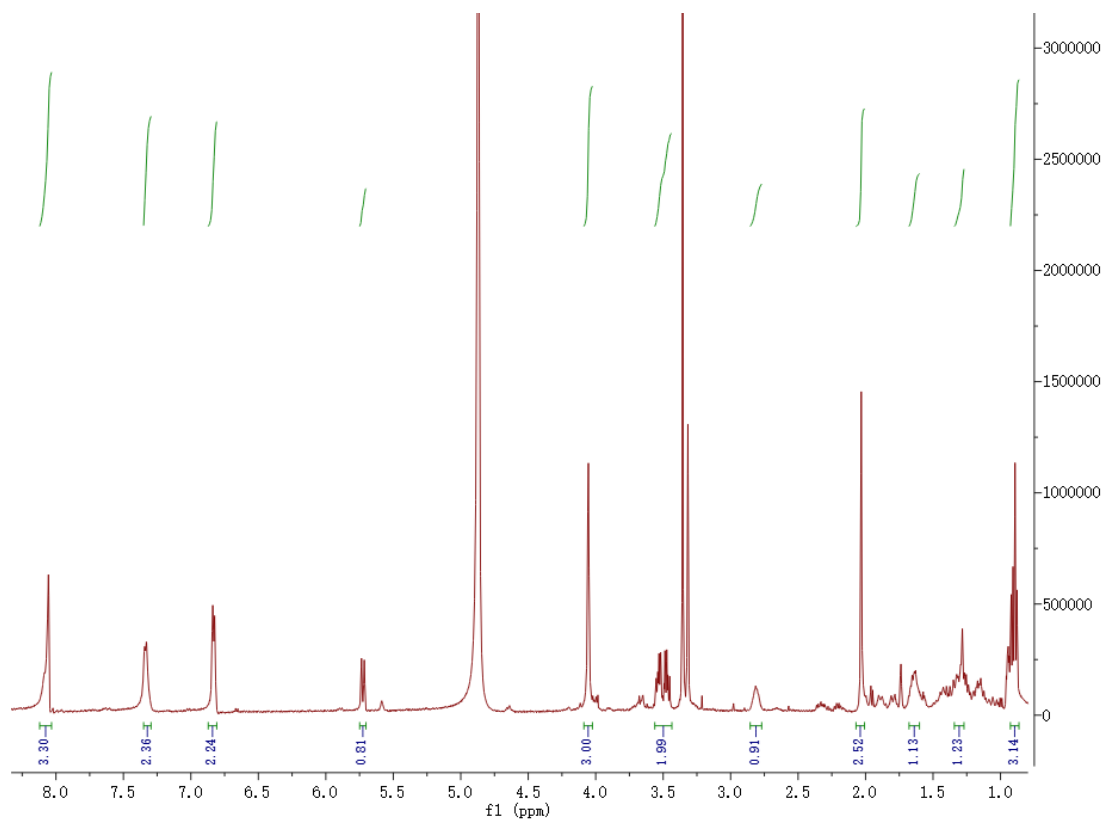

<sup>1</sup>H NMR spectrum of (10Z)-1-O-methyl-15-hydroxytenellin (**5**) (500 Hz, CD3OD-*d*<sub>4</sub>).

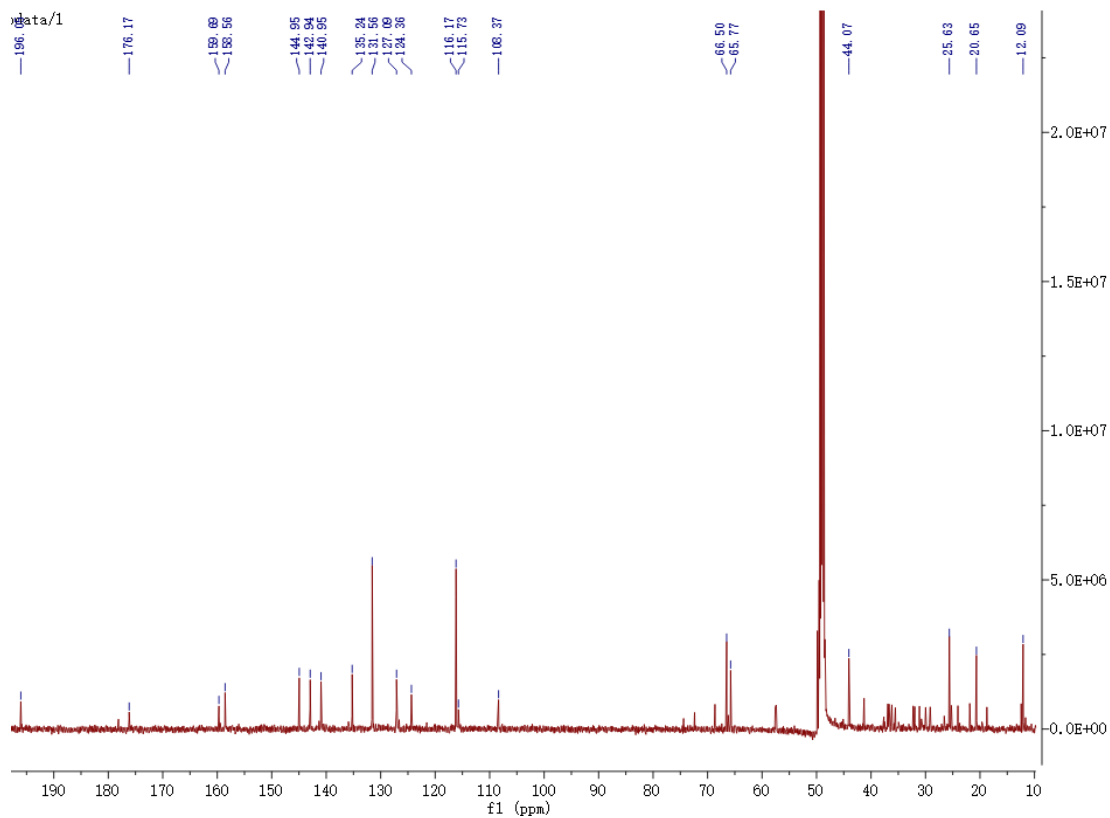

<sup>13</sup>C NMR spectrum of (10Z)-1-O-methyl-15-hydroxytenellin (**5**) (100 Hz, CD3OD-*d*<sub>4</sub>).

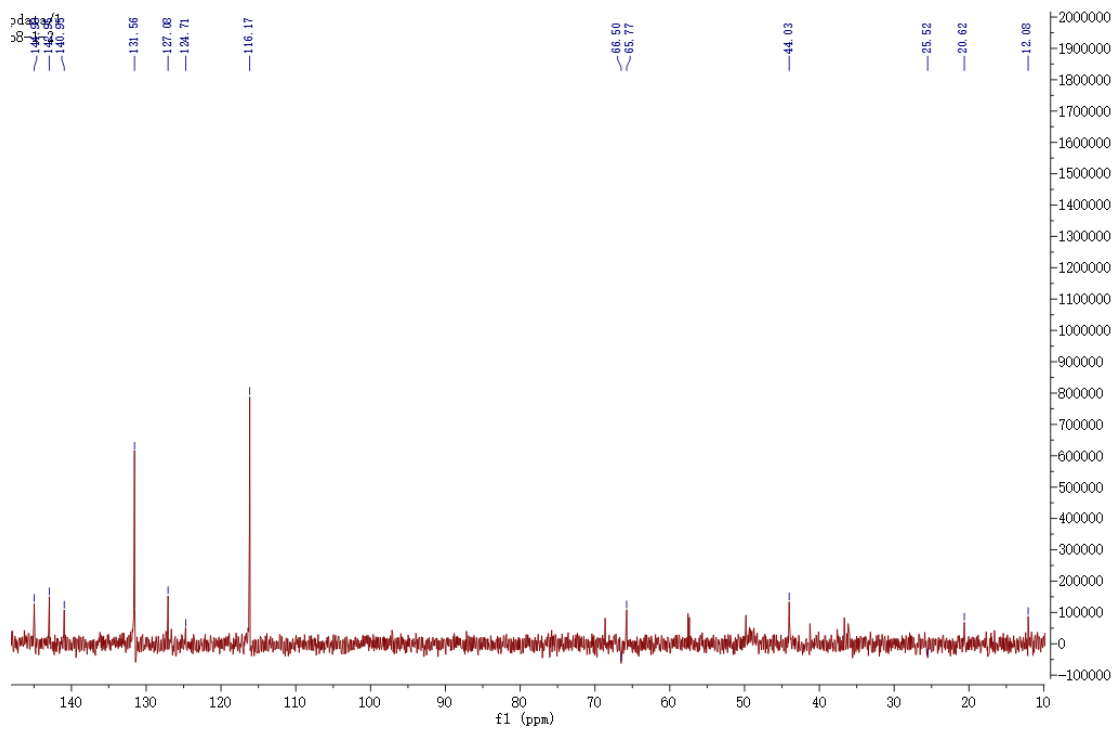

DEPT spectrum of (10Z)-1-O-methyl-15-hydroxytenellin (**5**) (100 Hz, CD<sub>3</sub>OD-*d*<sub>4</sub>).

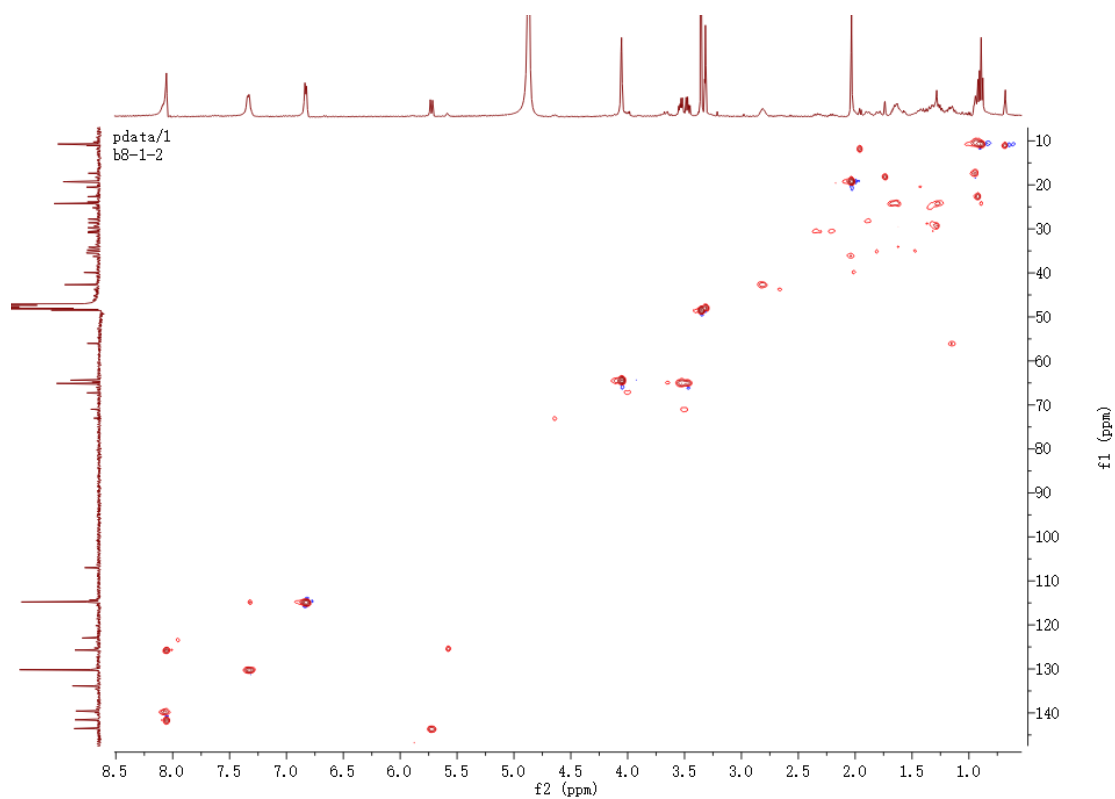

HSQC spectrum of (10Z)-1-O-methyl-15-hydroxytenellin (**5**).

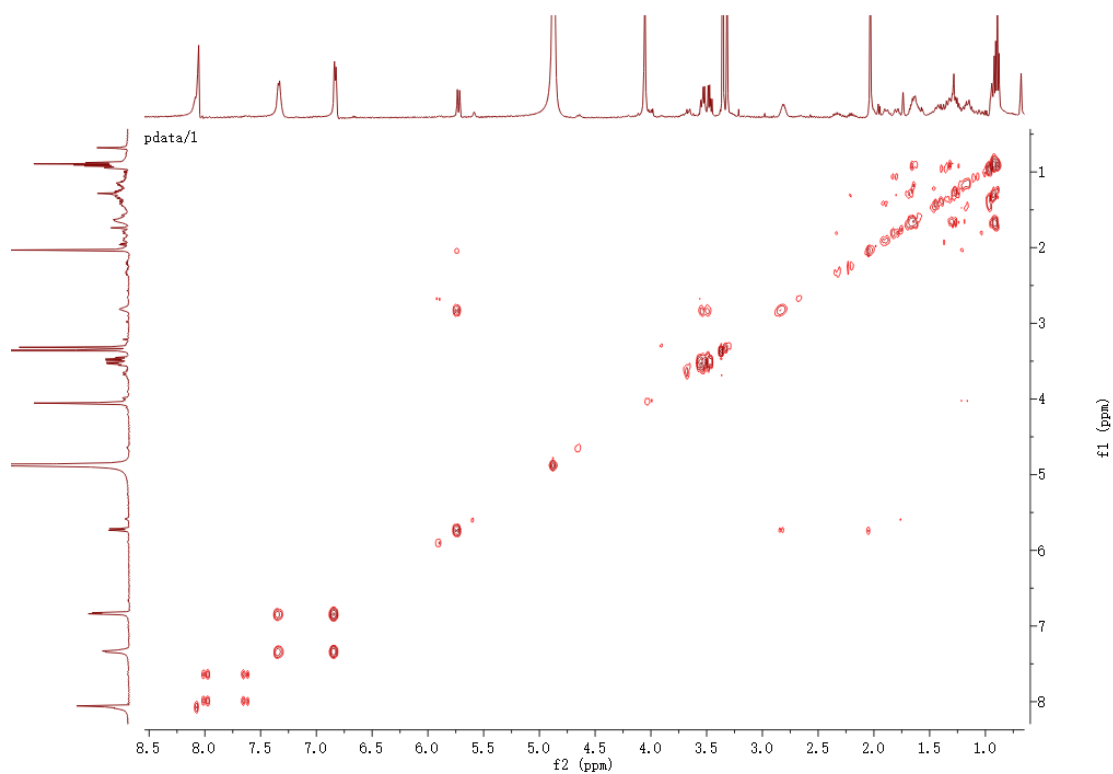

$^1\text{H}$ - $^1\text{H}$  COSY spectrum of (10Z)-1-O-methyl-15-hydroxytenellin (**5**) (500 Hz,  $\text{CD}_3\text{OD}-d_4$ ).

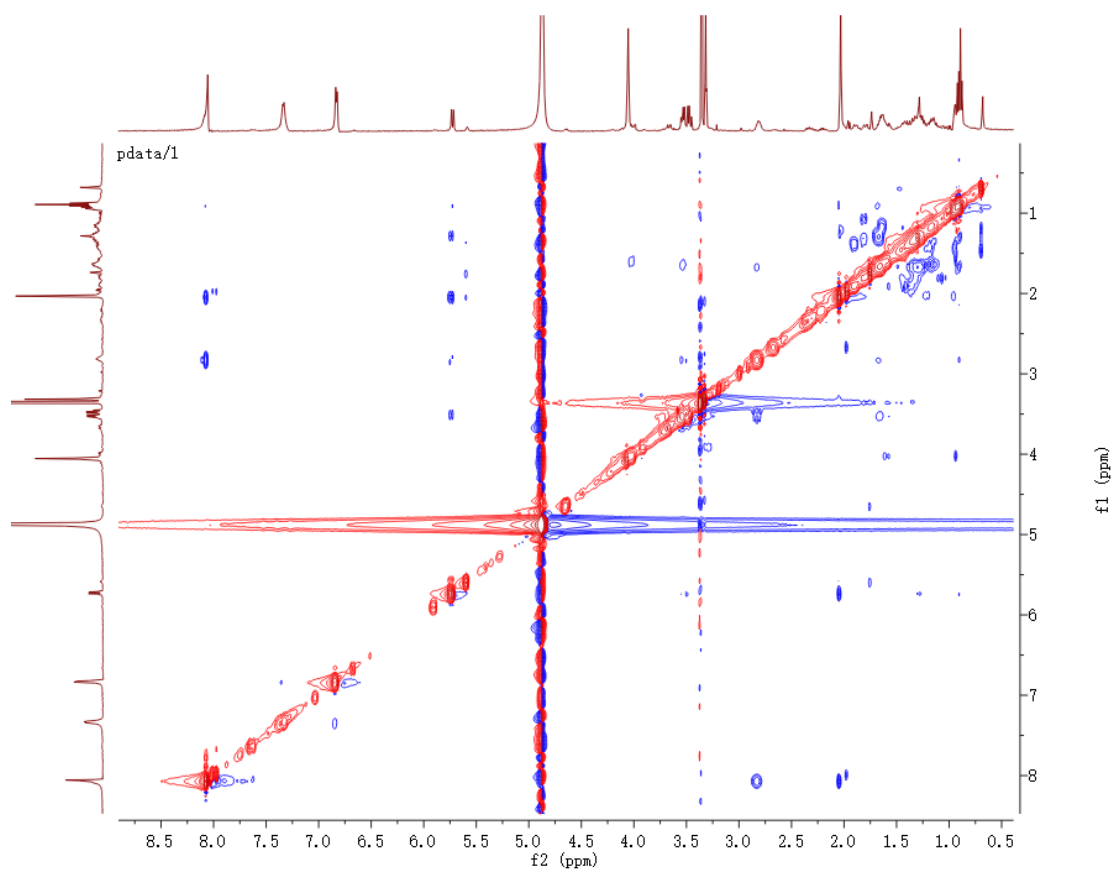

$^1\text{H}$ - $^1\text{H}$  NOESY spectrum of (10Z)-1-O-methyl-15-hydroxytenellin (**5**) (500 Hz,  $\text{CD}_3\text{OD}-d_4$ ).

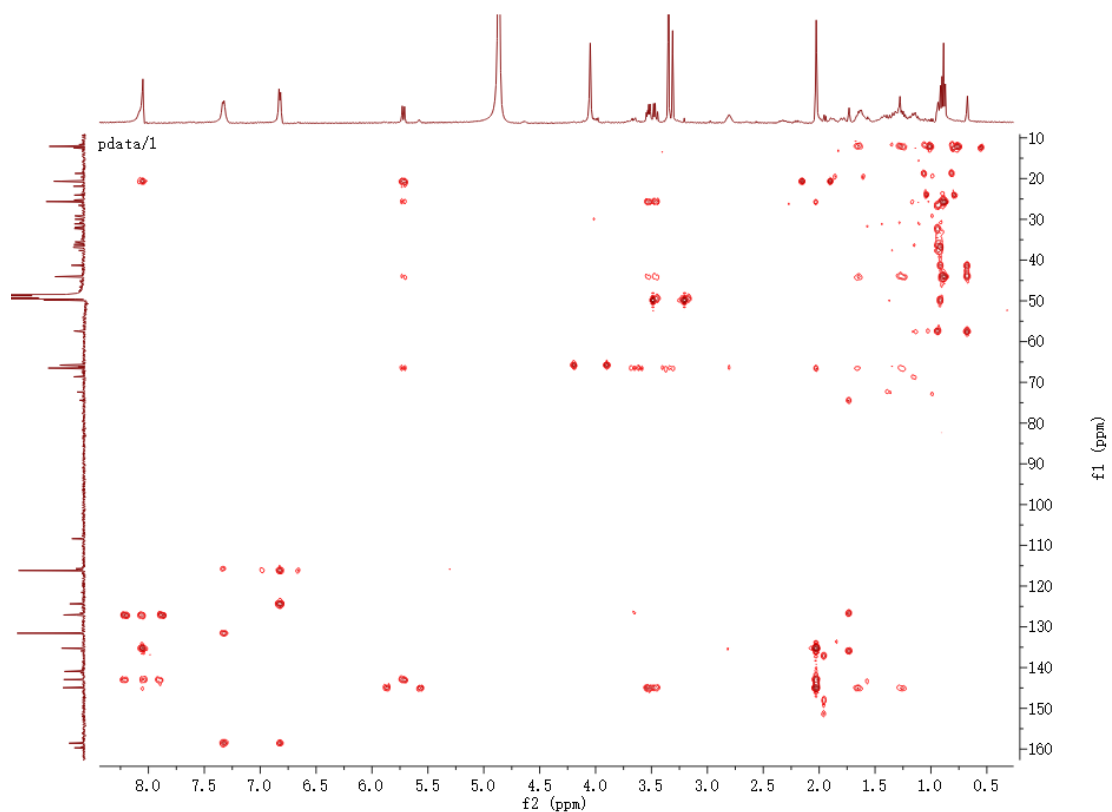

HMBC spectrum of (10Z)-1-O-methyl-15-hydroxytenellin (**5**).

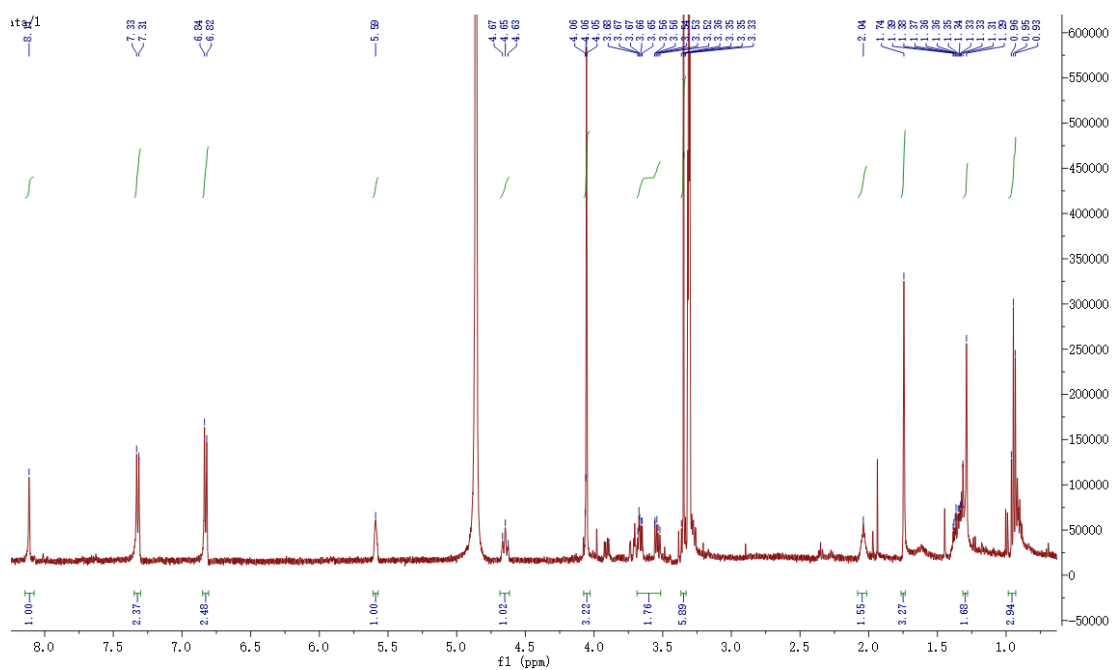

$^1\text{H}$  NMR spectrum of *O*-methyltenellin A (**6**) (500 Hz,  $\text{CD}_3\text{OD}-d_4$ ).

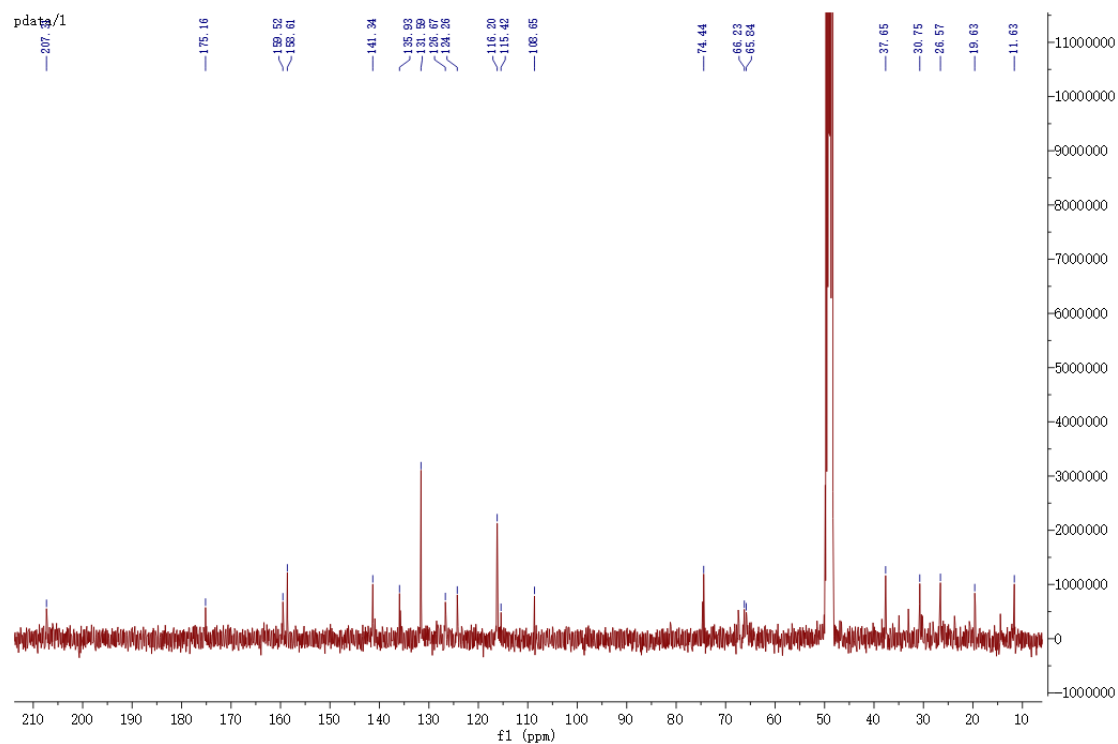

<sup>13</sup>C NMR spectrum of *O*-methyltenellin A (**6**) (100 Hz, CD<sub>3</sub>OD-*d*<sub>4</sub>).

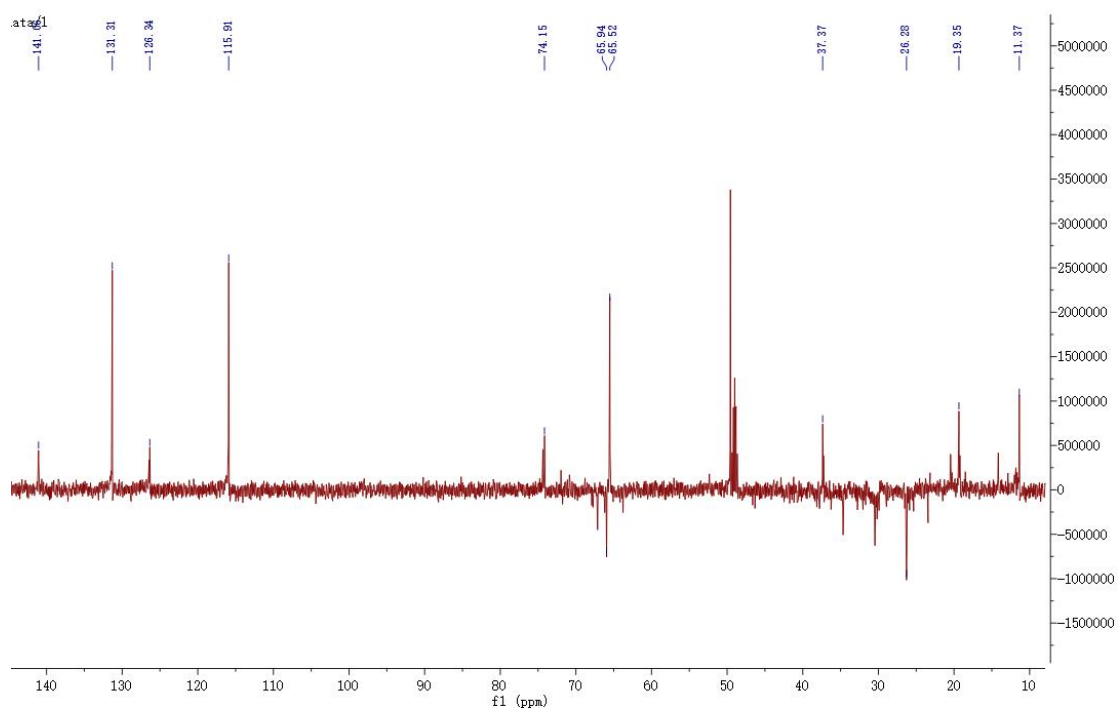

DEPT spectrum of *O*-methyltenellin A (**6**) (100 Hz, CD<sub>3</sub>OD-*d*<sub>4</sub>).

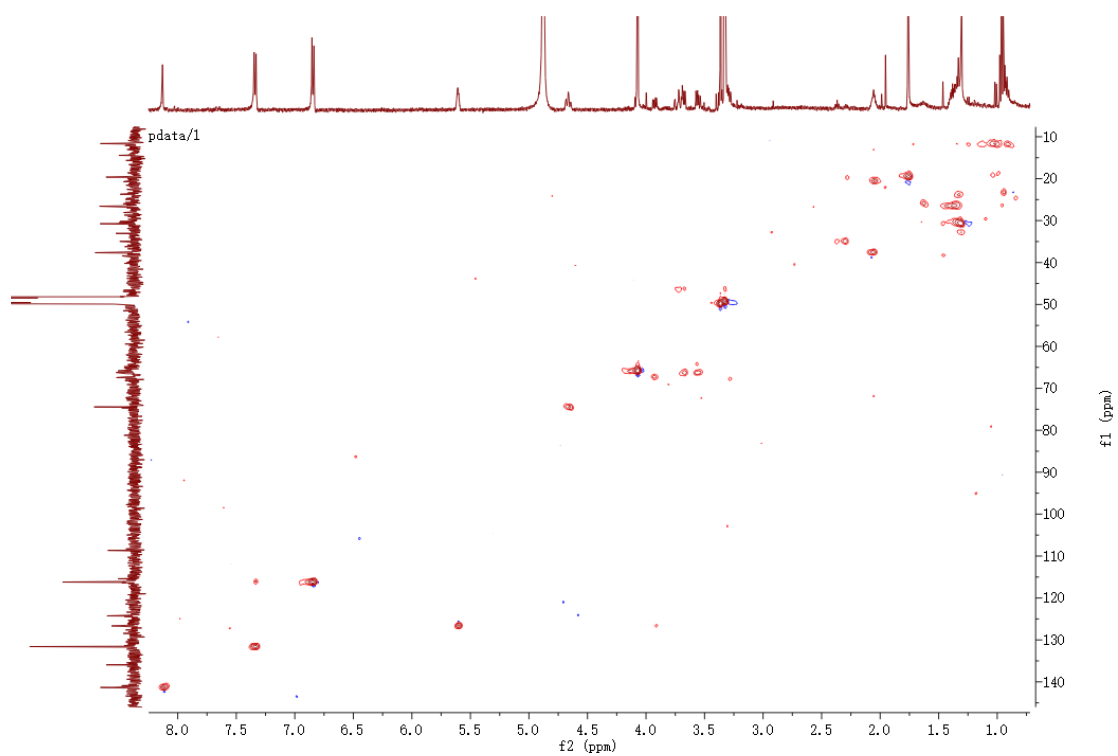

HSQC spectrum of *O*-methyltenellin A (**6**).

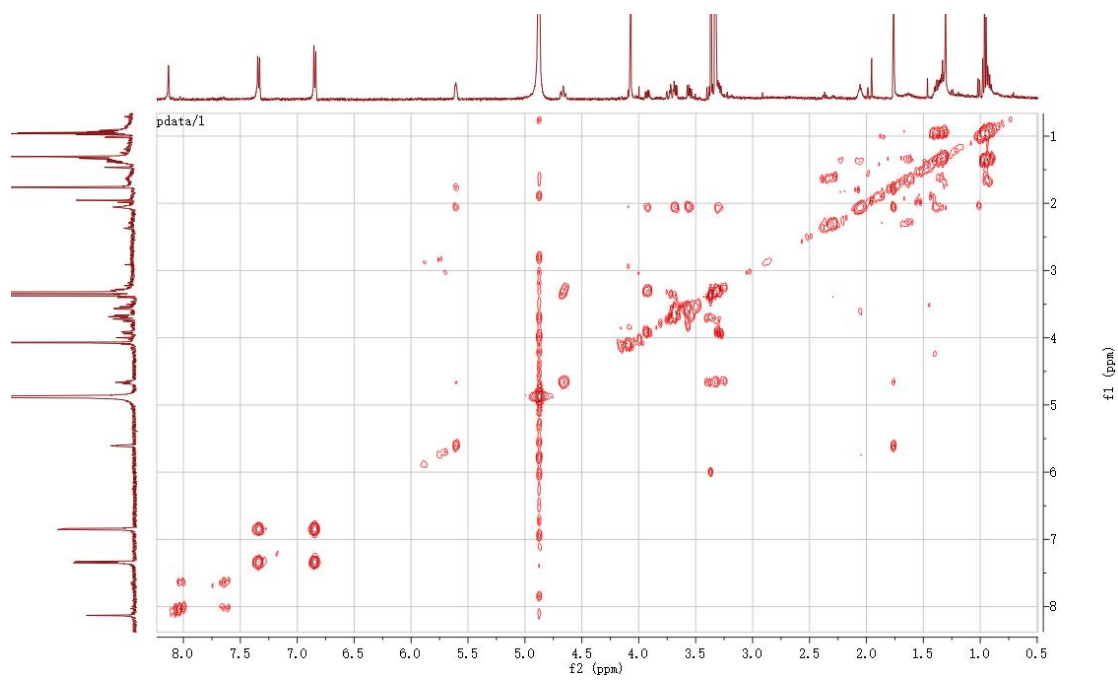

$^1\text{H}$ - $^1\text{H}$  COSY spectrum of *O*-methyltenellin A (**6**) (500 Hz,  $\text{CD}_3\text{OD}-d_4$ ).



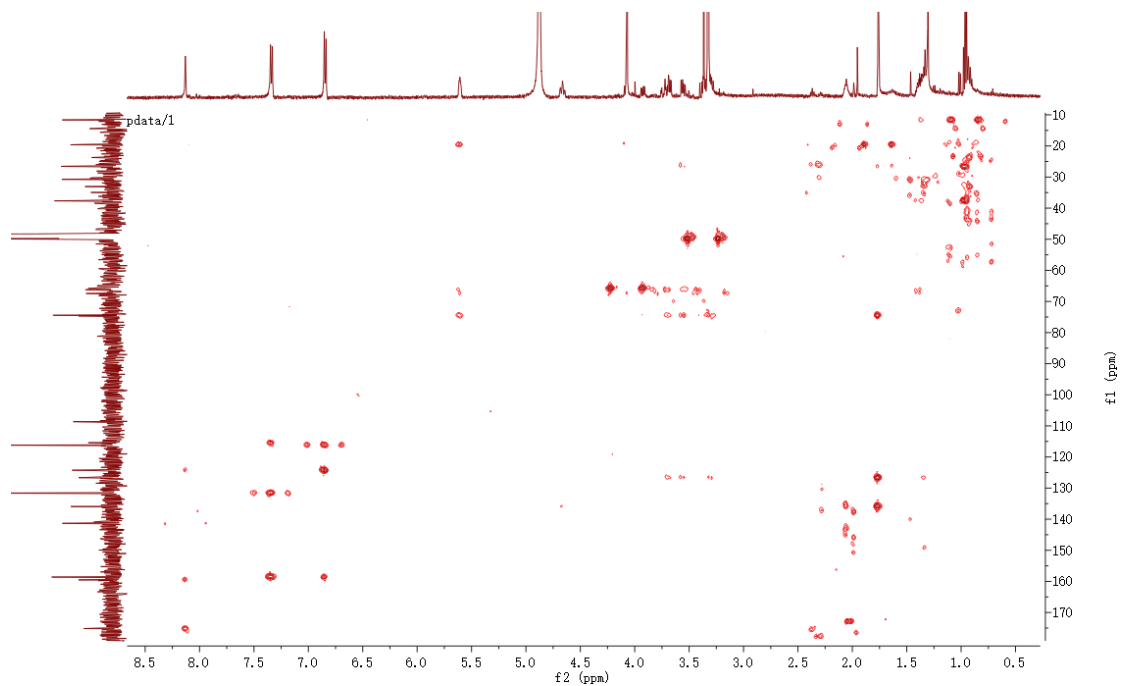

HMBC spectrum of *O*-methylenellin A (6).

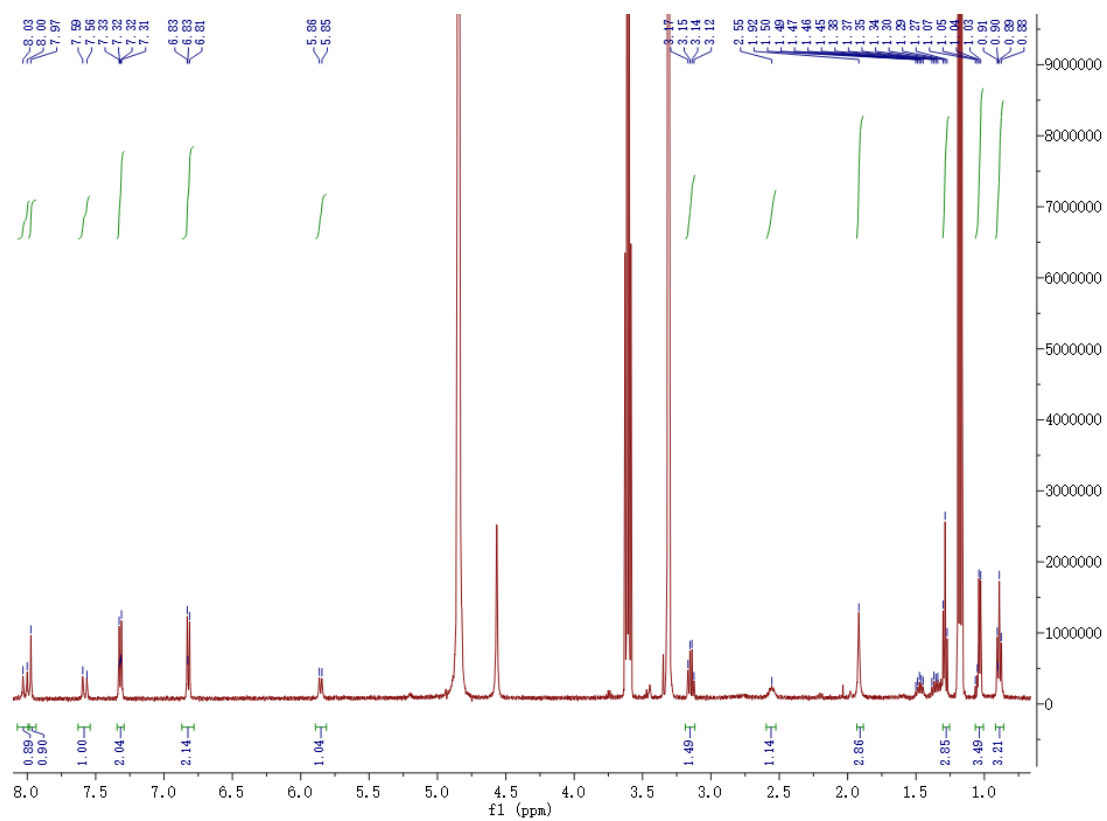

$^1\text{H}$  NMR spectrum of tenellin (7) (500 Hz,  $\text{CD}_3\text{OD}-d_4$ ).

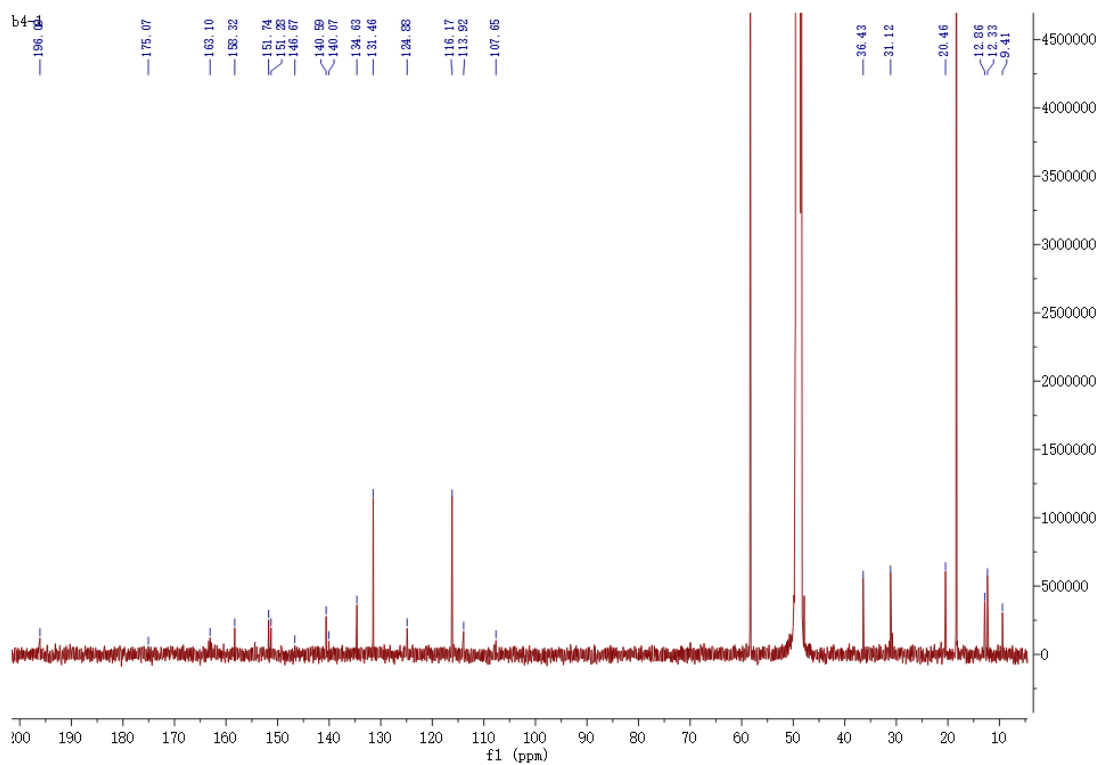

$^{13}\text{C}$  NMR spectrum of tenellin (7) (100 Hz,  $\text{CD}_3\text{OD}-d_4$ ).

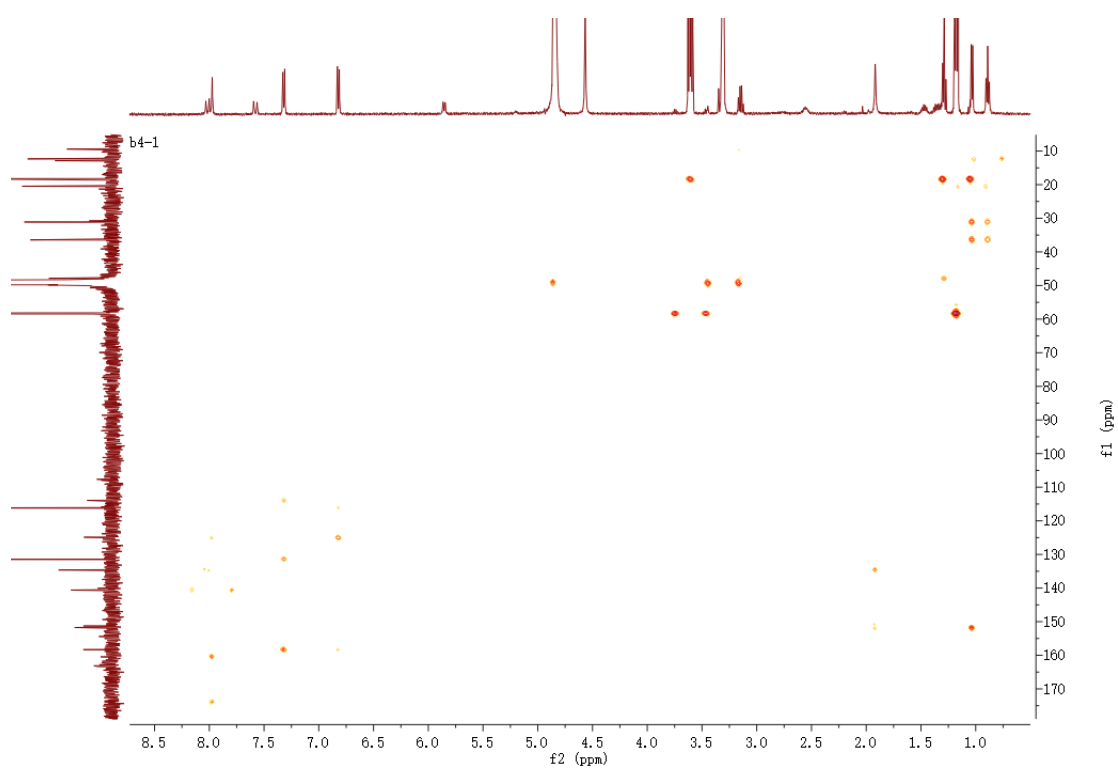

HMBC spectrum of tenellin (7).

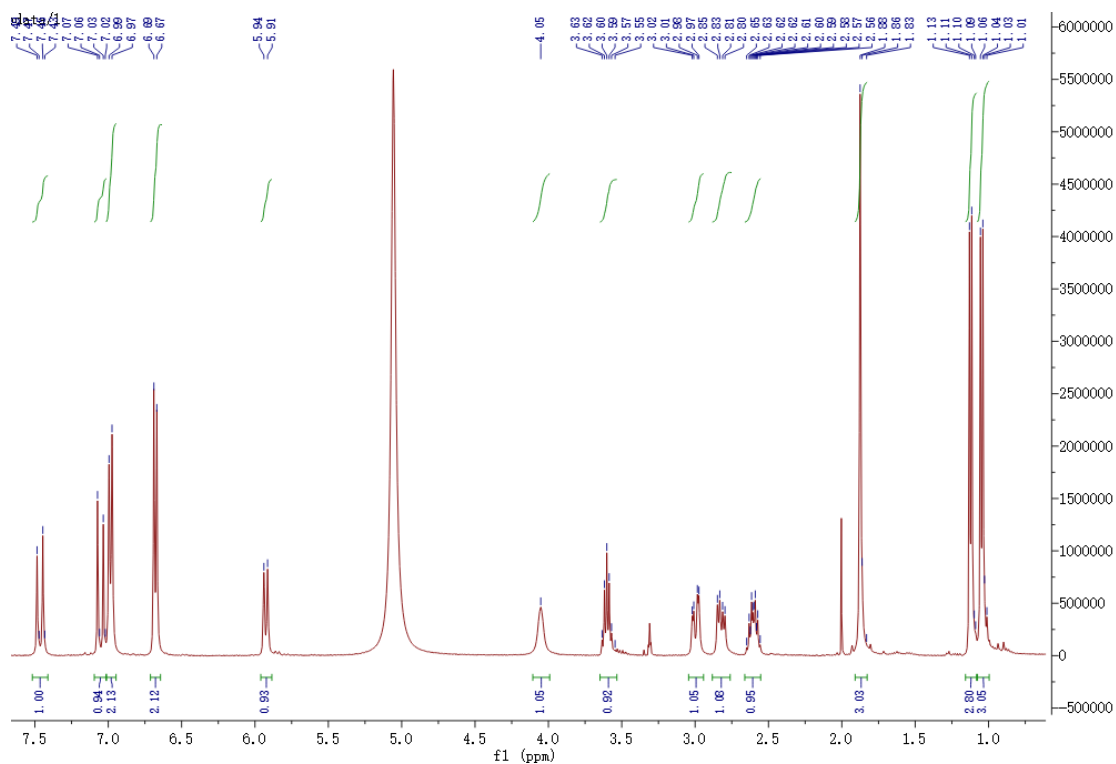

$^1\text{H}$  NMR spectrum of 12-hydropretenellin A (**8**) (400 Hz,  $\text{CD}_3\text{OD}-d_4$ ).

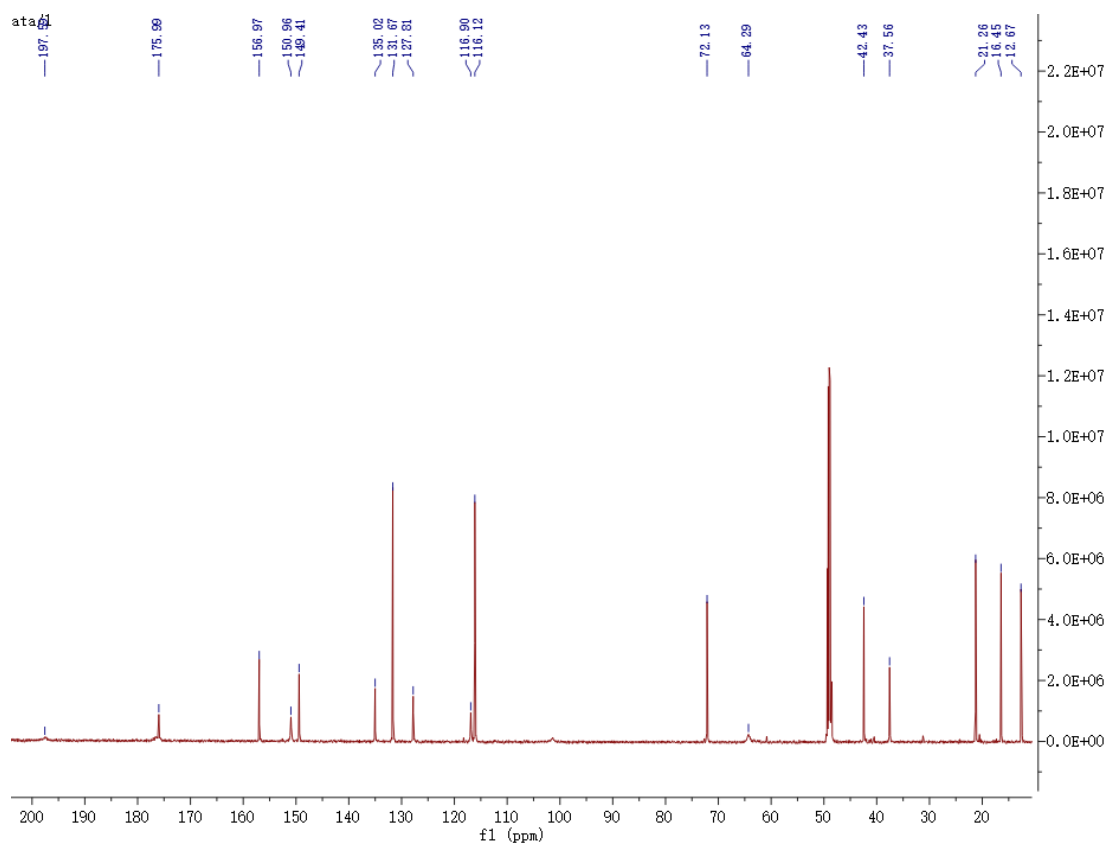

$^{13}\text{C}$  NMR spectrum of 12-hydropretenellin A (**8**) (100 Hz,  $\text{CD}_3\text{OD}-d_4$ ).

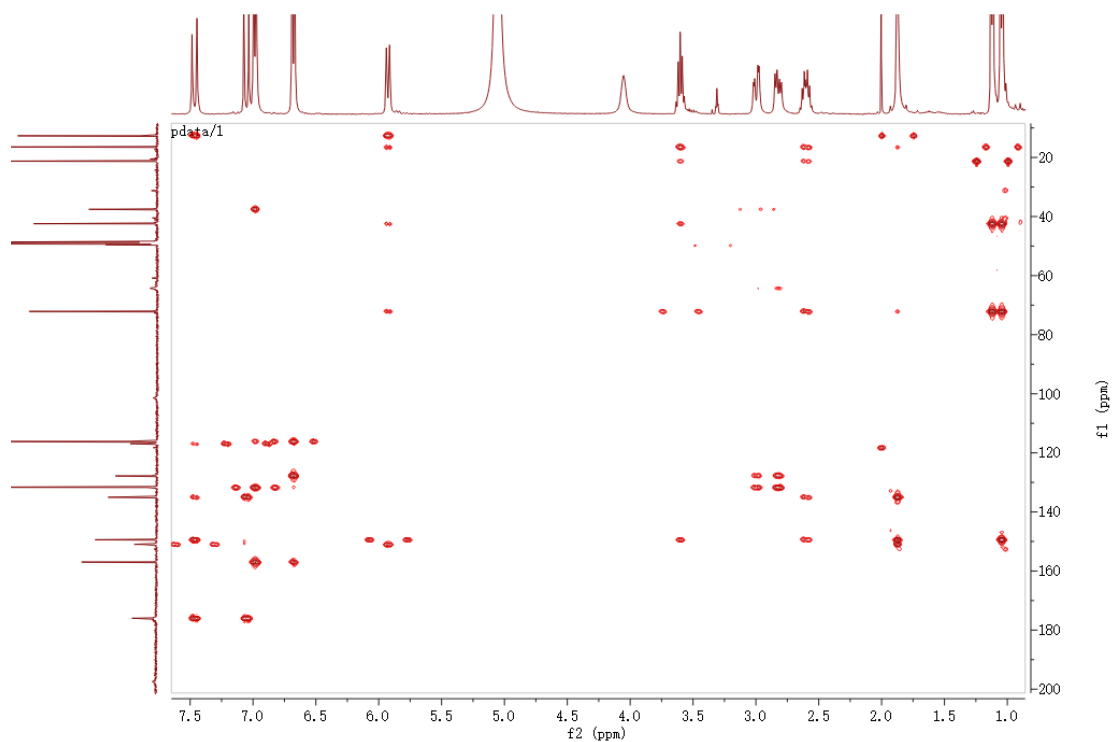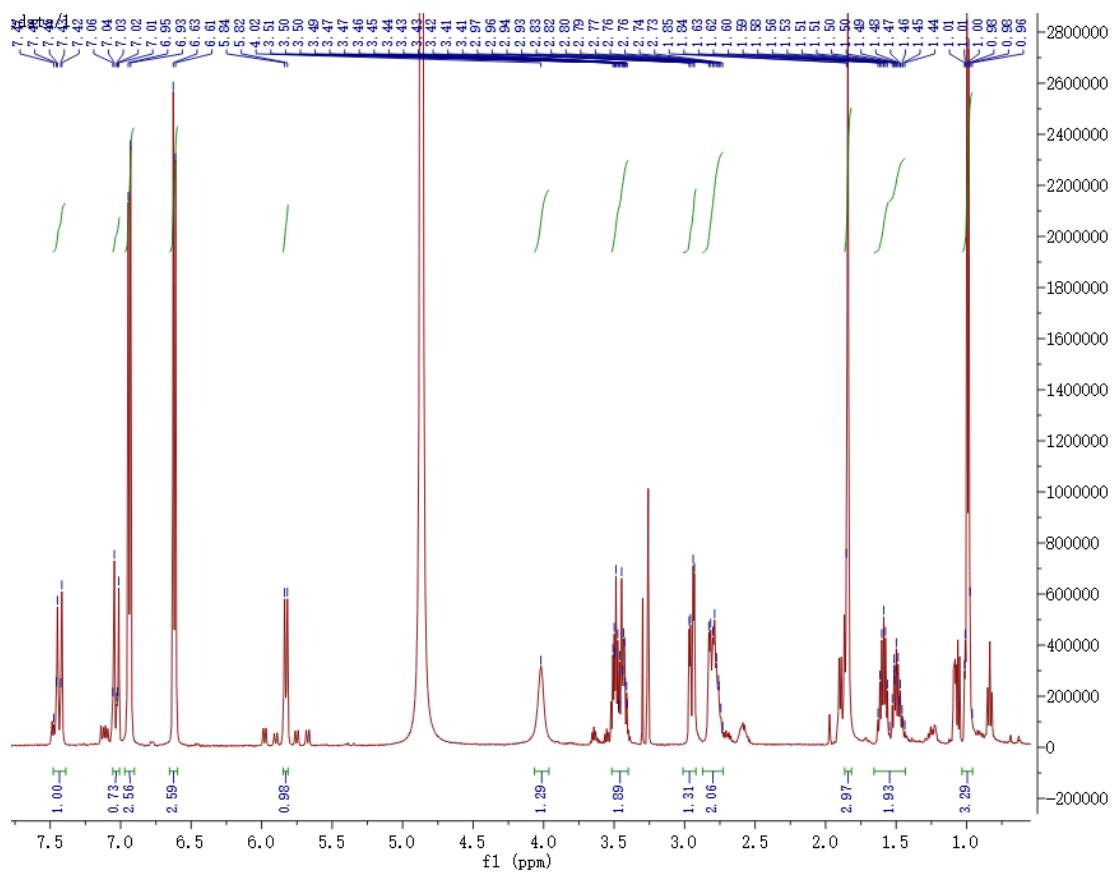

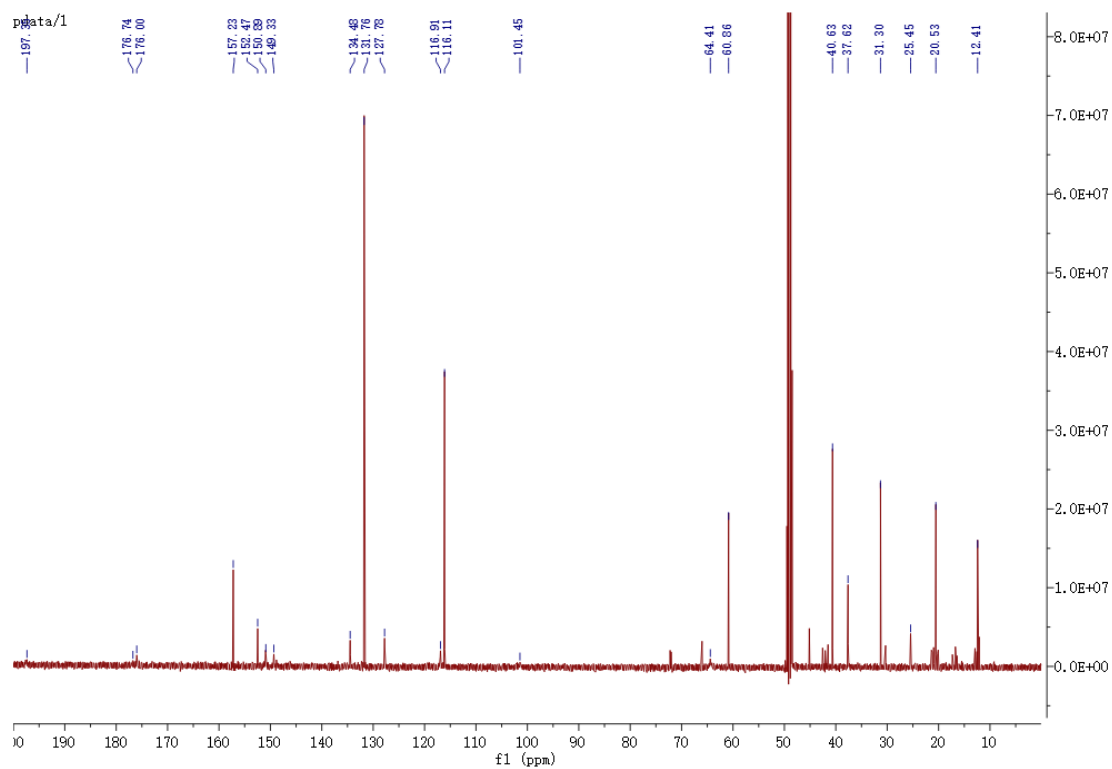

$^{13}\text{C}$  NMR spectrum of 13-hydropretenellin A (**9**) (100 Hz,  $\text{CD}_3\text{OD}-d_4$ ).

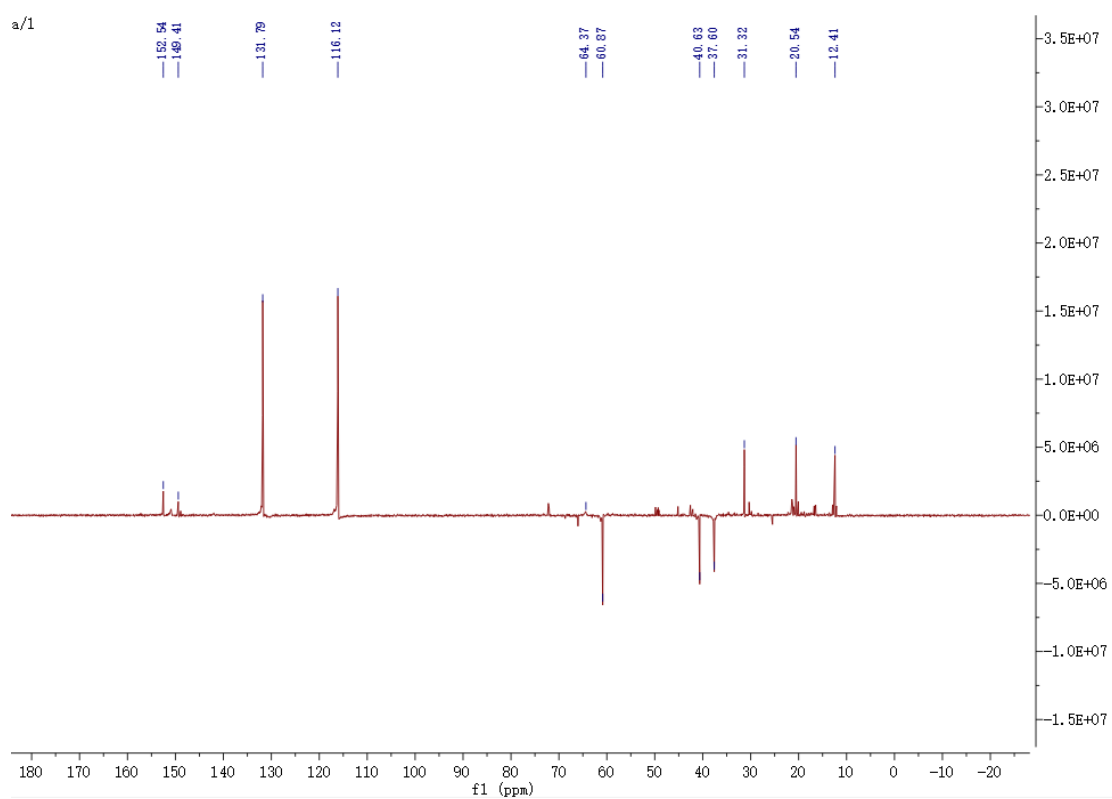

DEPT spectrum of 13-hydropretenellin A (**9**) (100 Hz,  $\text{CD}_3\text{OD}-d_4$ ).

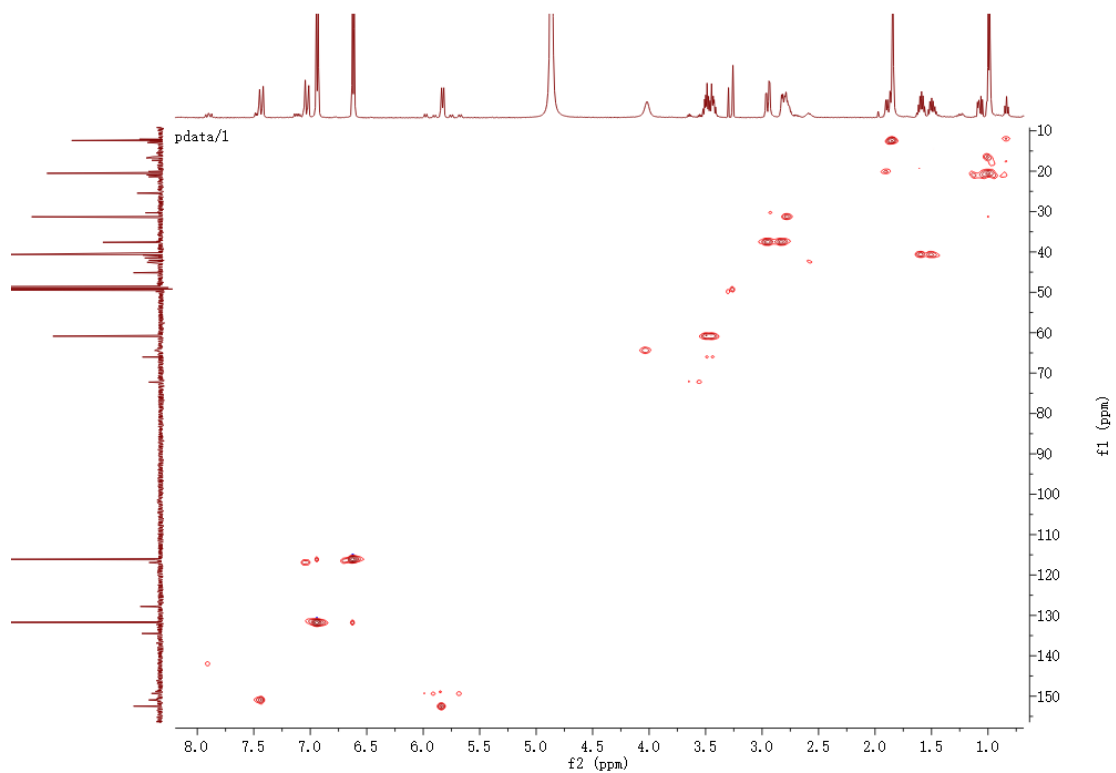

HSQC spectrum of 13-hydroptrenellin A (**9**).

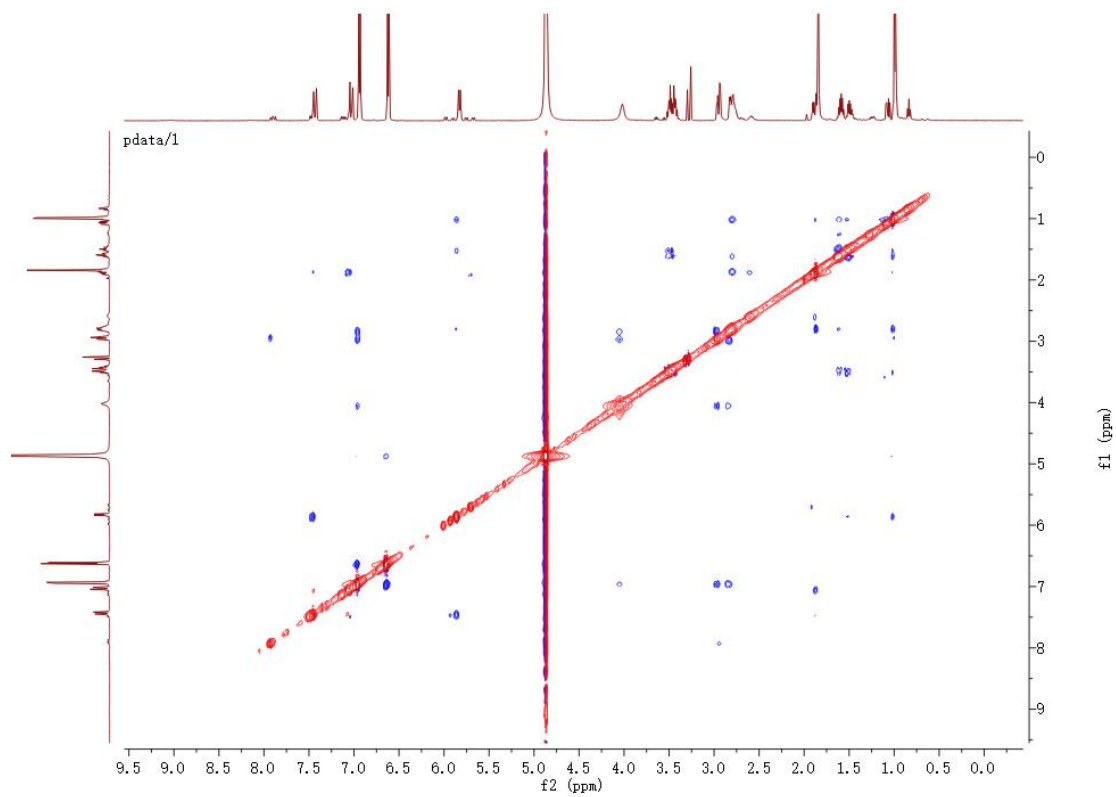

$^1\text{H}$ - $^1\text{H}$  COSY spectrum of 13-hydroptrenellin A (**9**) (500 Hz,  $\text{CD}_3\text{OD}-d_4$ ).

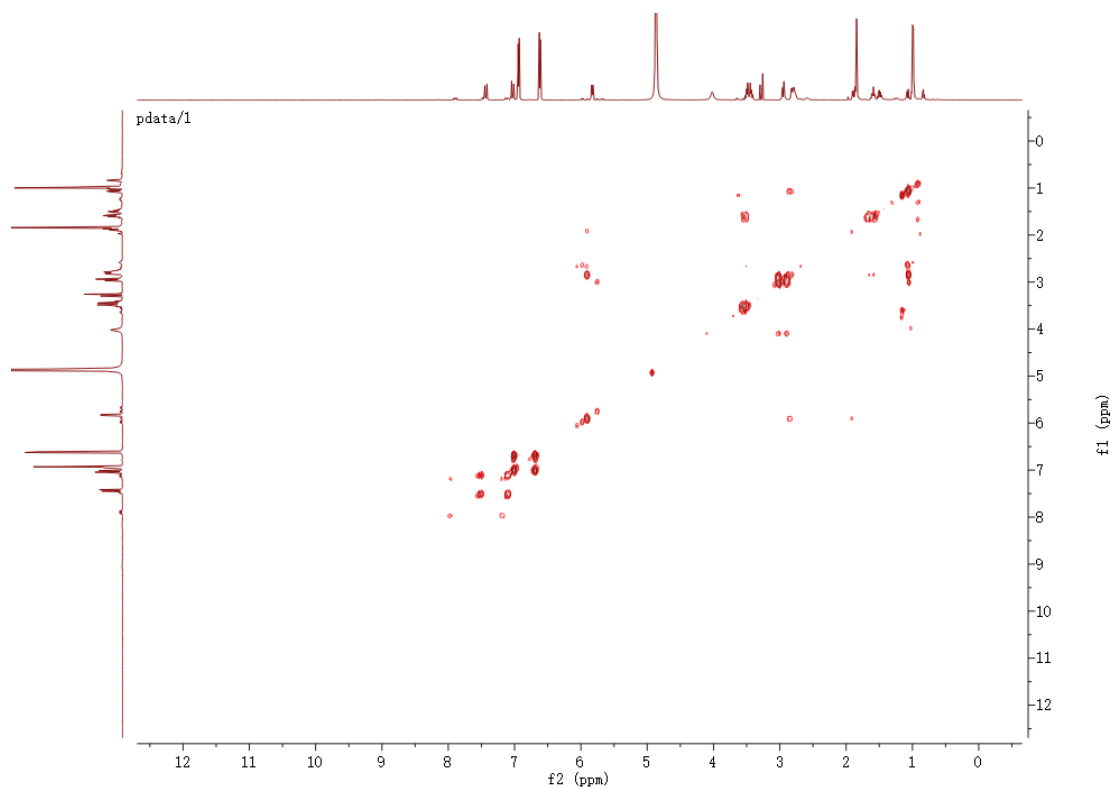

$^1\text{H}$ - $^1\text{H}$  NOESY spectrum of 13-hydropretenellin A (**9**) (500 Hz,  $\text{CD}_3\text{OD}-d_4$ ).

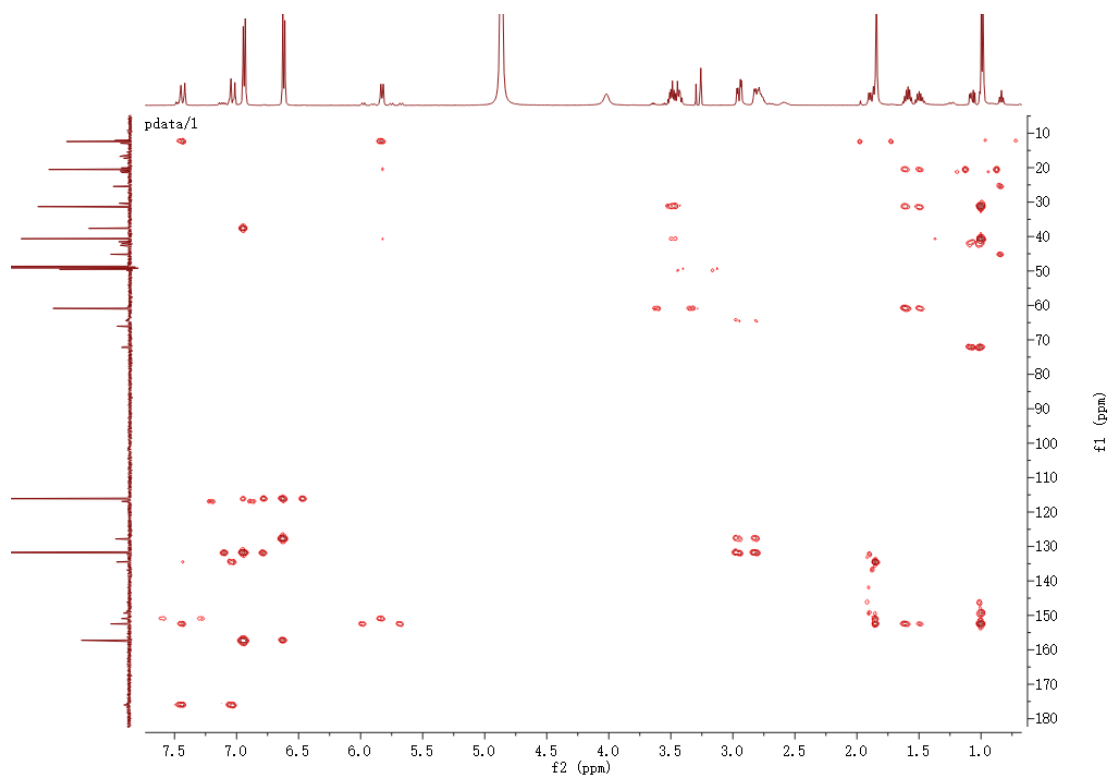

HMBC spectrum of 13-hydropretenellin A (**9**).





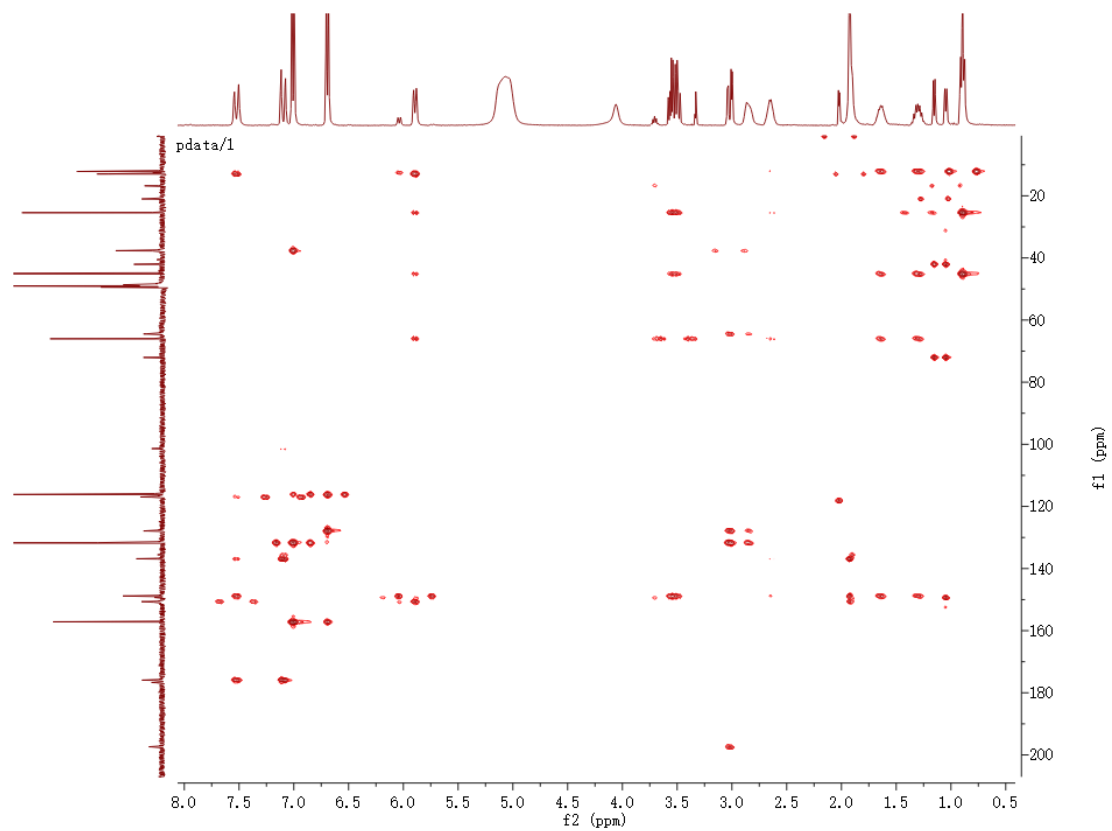

HMBC spectrum of 14-hydropretenellin A (**10**).

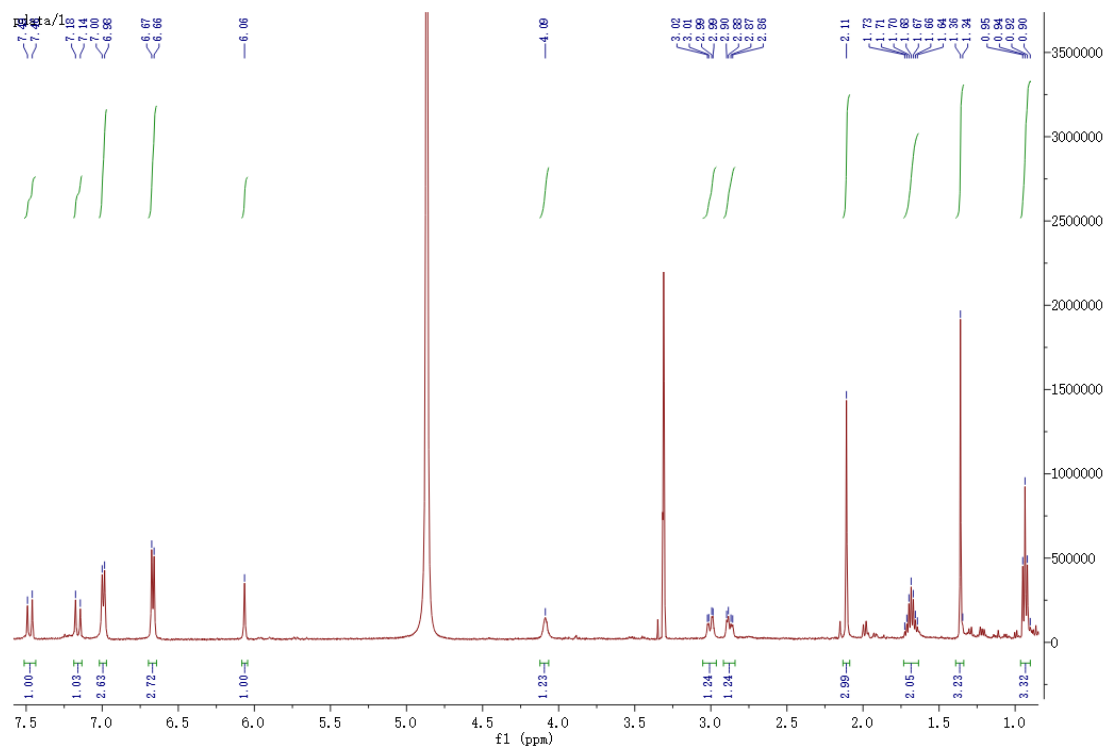

<sup>1</sup>H NMR spectrum of 11-hydropretenellin A (**11**) (500 Hz, CD<sub>3</sub>OD-*d*<sub>4</sub>).

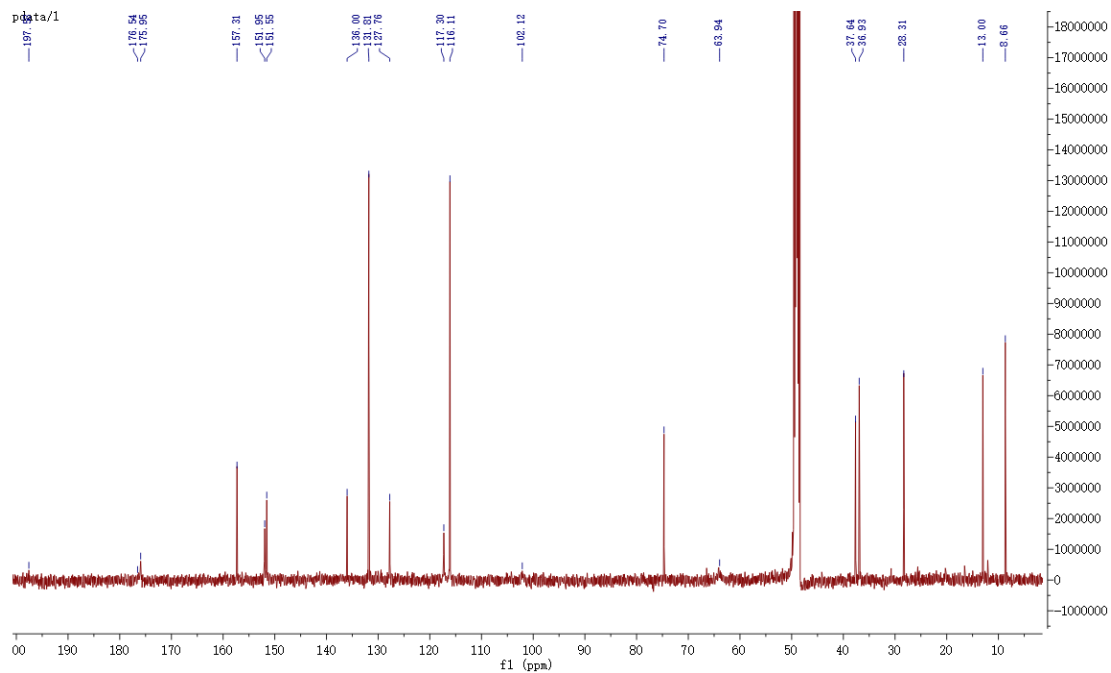

<sup>13</sup>C NMR spectrum of 11-hydropretrenellin A (**11**) (100 Hz, CD<sub>3</sub>OD-*d*<sub>4</sub>).

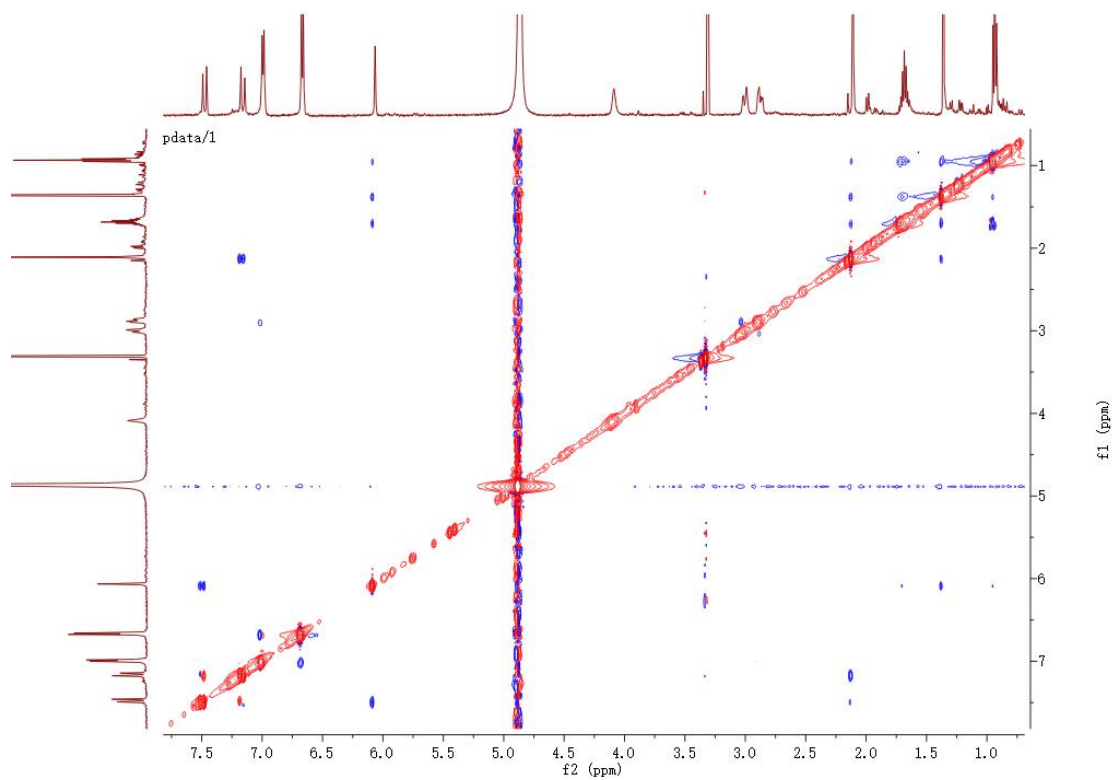

<sup>1</sup>H-<sup>1</sup>H NOESY spectrum of 11-hydropretrenellin A (**11**) (500 Hz, CD<sub>3</sub>OD-*d*<sub>4</sub>).

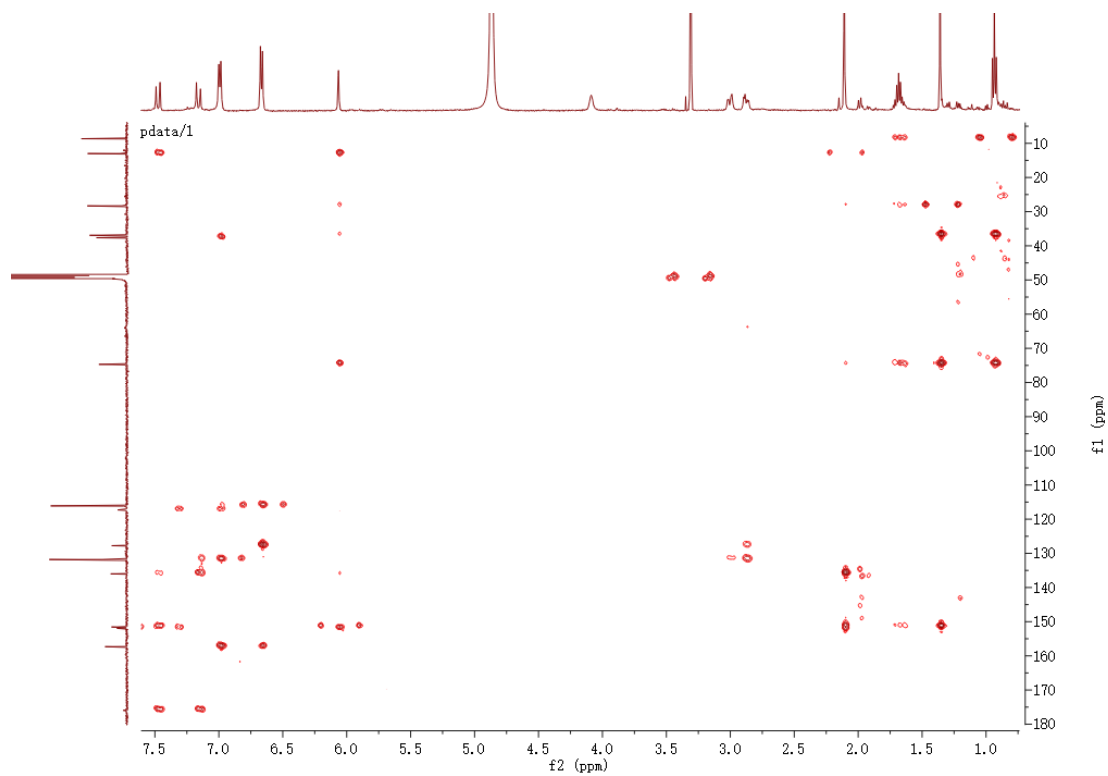

HMBC spectrum of 11-hydropretenellin A (**11**).

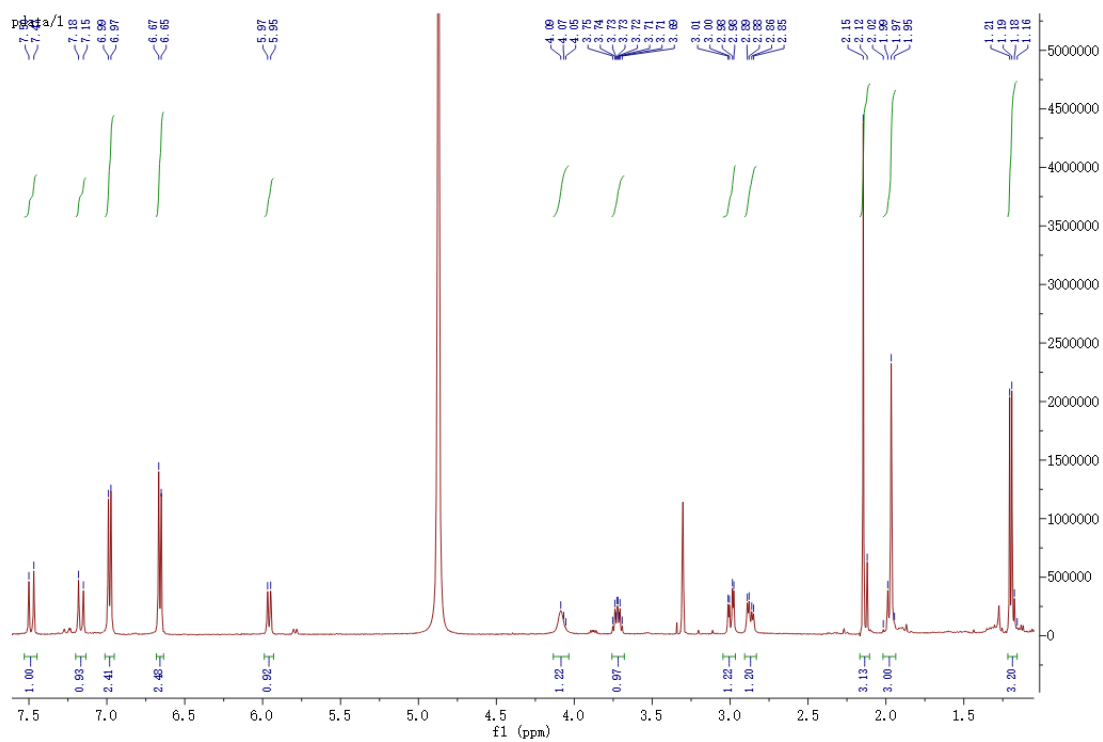

$^1\text{H}$  NMR spectrum of 12-oxopretenellin A (**12**) (500 Hz,  $\text{CD}_3\text{OD}-d_4$ ).

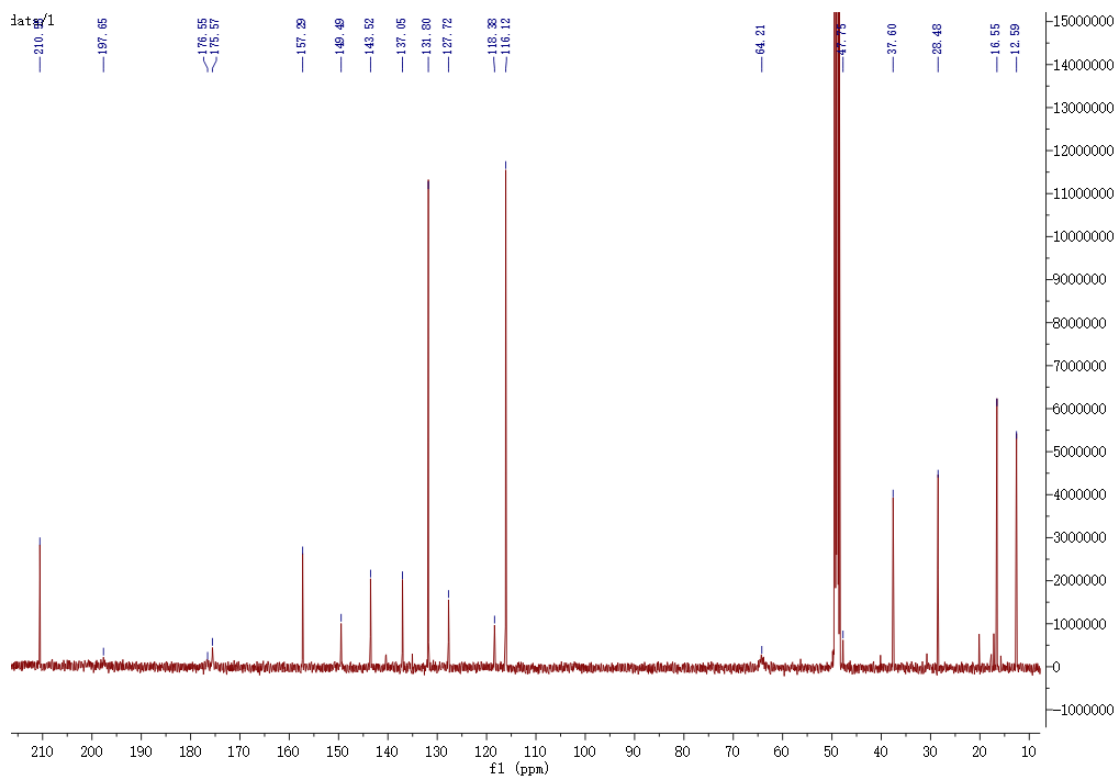

$^{13}\text{C}$  NMR spectrum of 12-oxopretenellin A (**12**) (100 Hz,  $\text{CD}_3\text{OD}-d_4$ ).

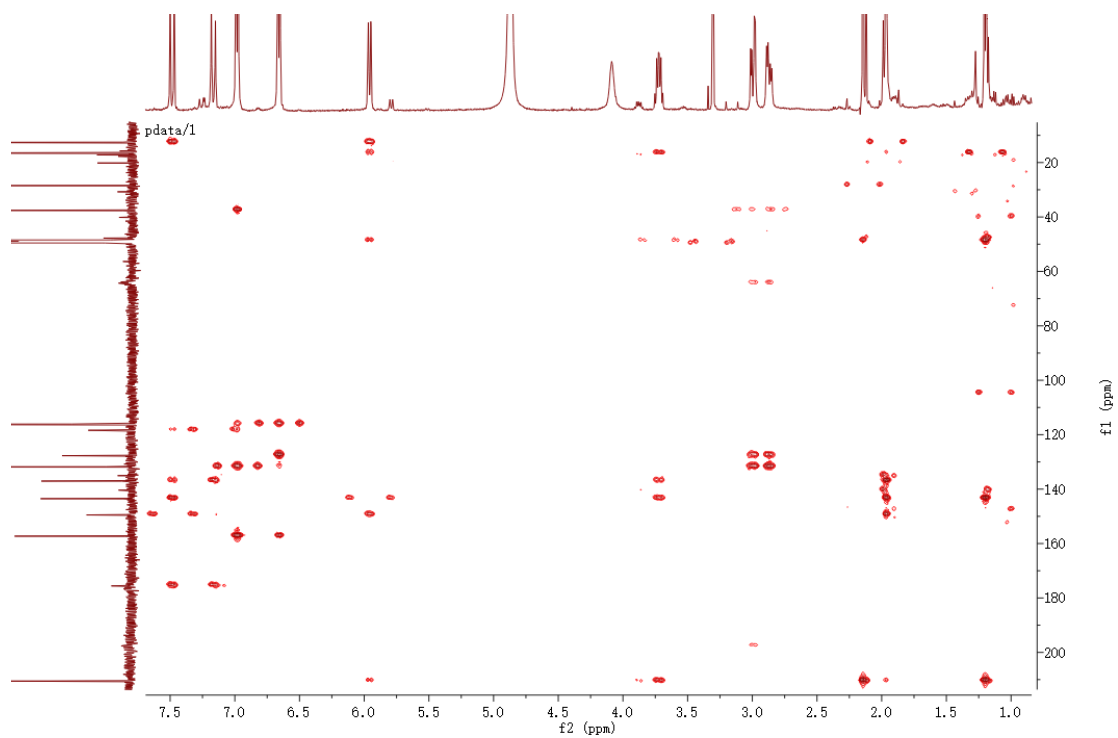

HMBC spectrum of 12-oxopretenellin A (**12**).

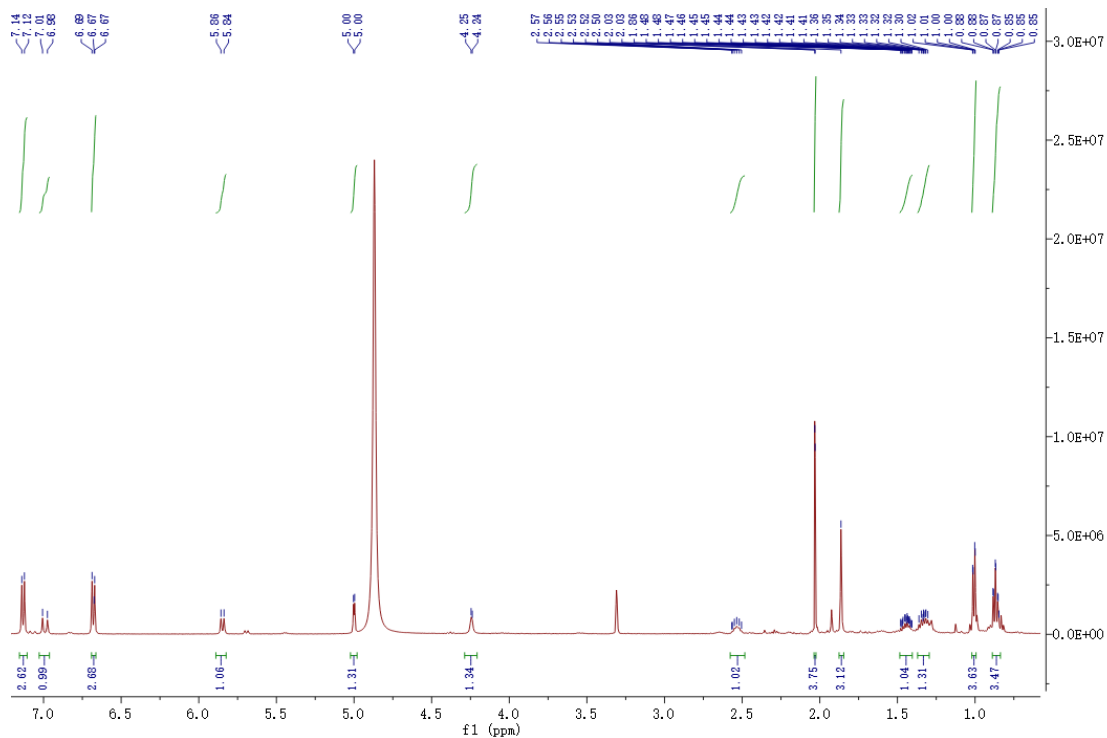

$^1\text{H}$  NMR spectrum of prototenellin D (**13**) (500 Hz,  $\text{CD}_3\text{OD}-d_4$ ).

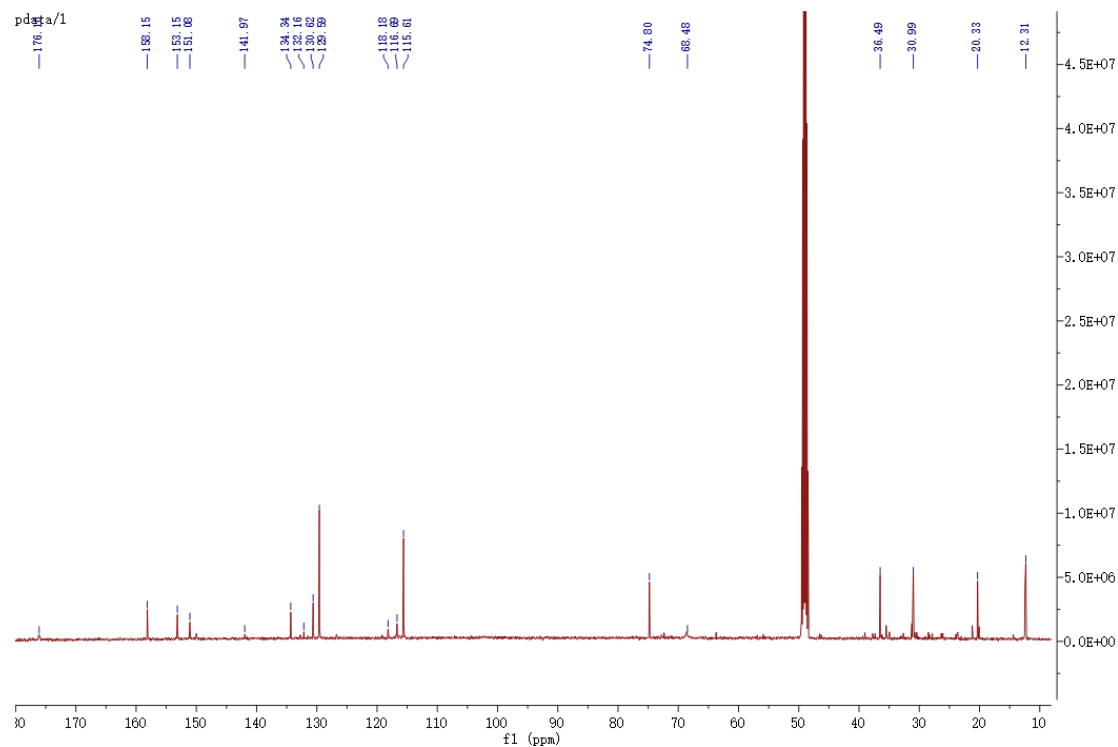

$^{13}\text{C}$  NMR spectrum of prototenellin D (**13**) (100 Hz,  $\text{CD}_3\text{OD}-d_4$ ).

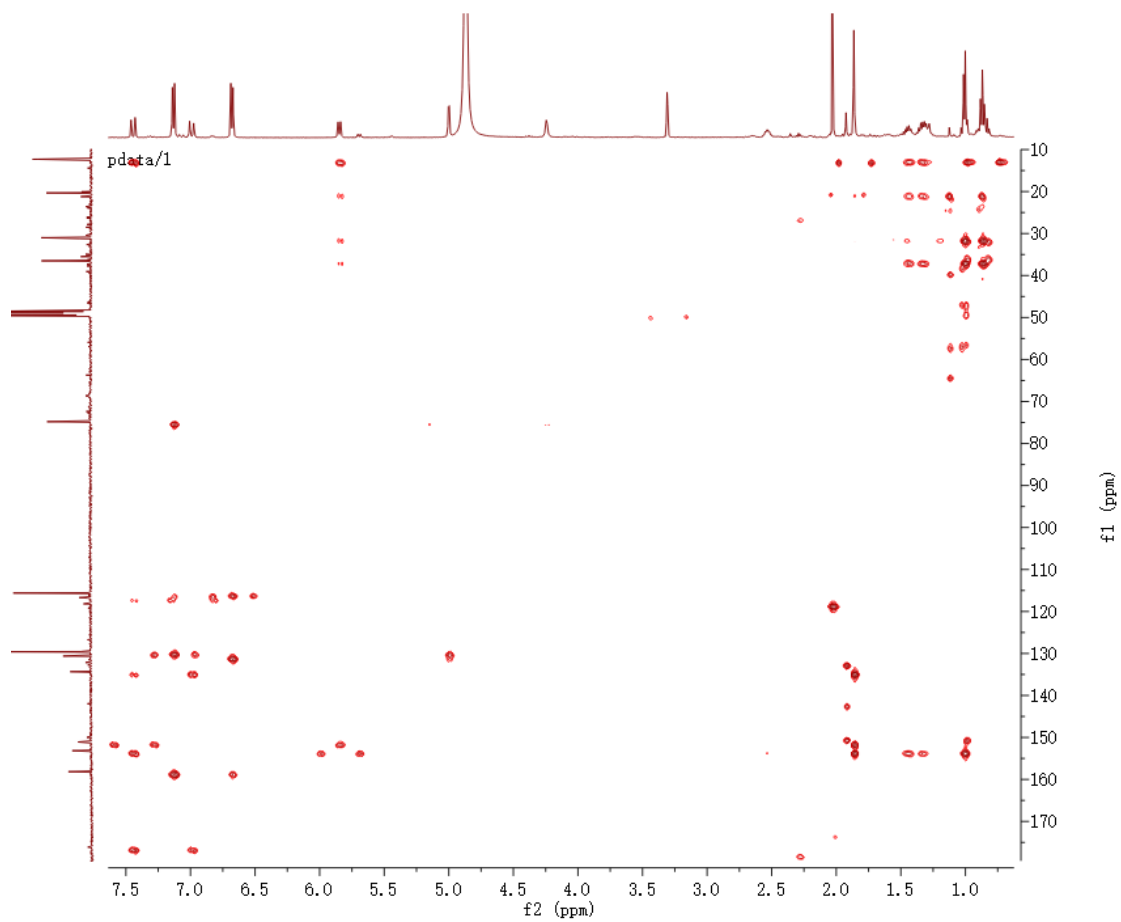

HMBC spectrum of prototenellin D (13).

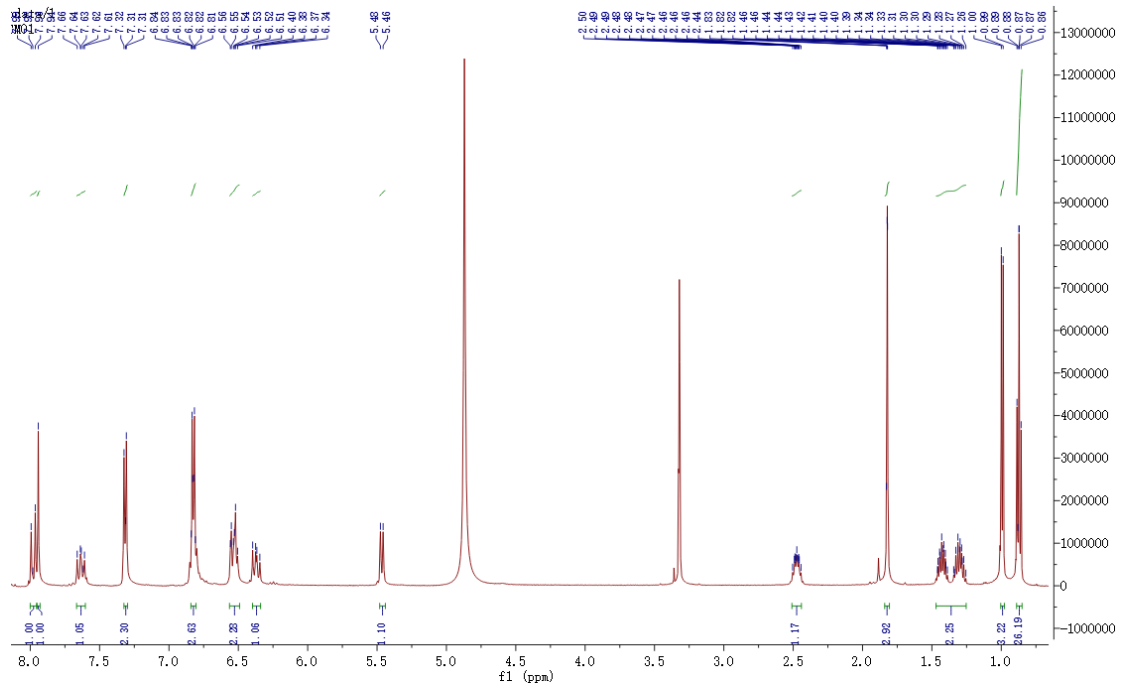

<sup>1</sup>H NMR spectrum of Farinosone B (500 Hz, CD<sub>3</sub>OD-*d*<sub>4</sub>).

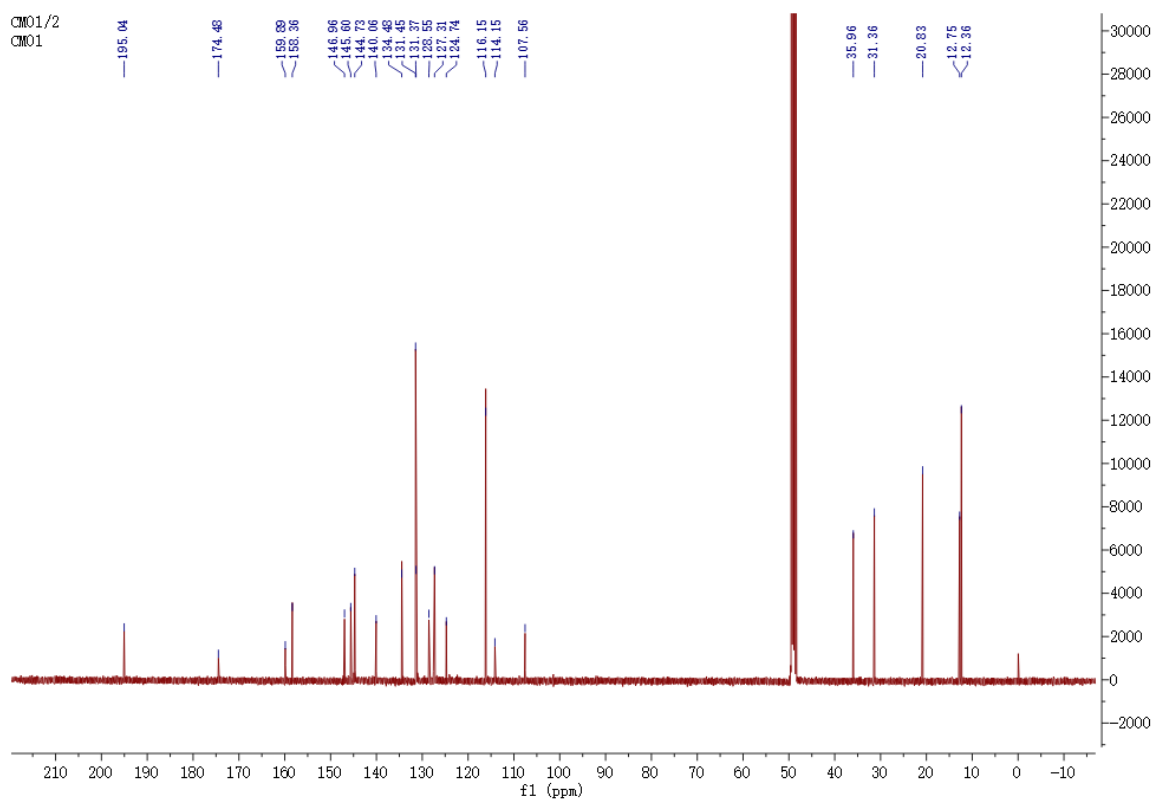

$^{13}\text{C}$  NMR spectrum of **Farinosone B** (100 Hz,  $\text{CD}_3\text{OD}-d_4$ ).

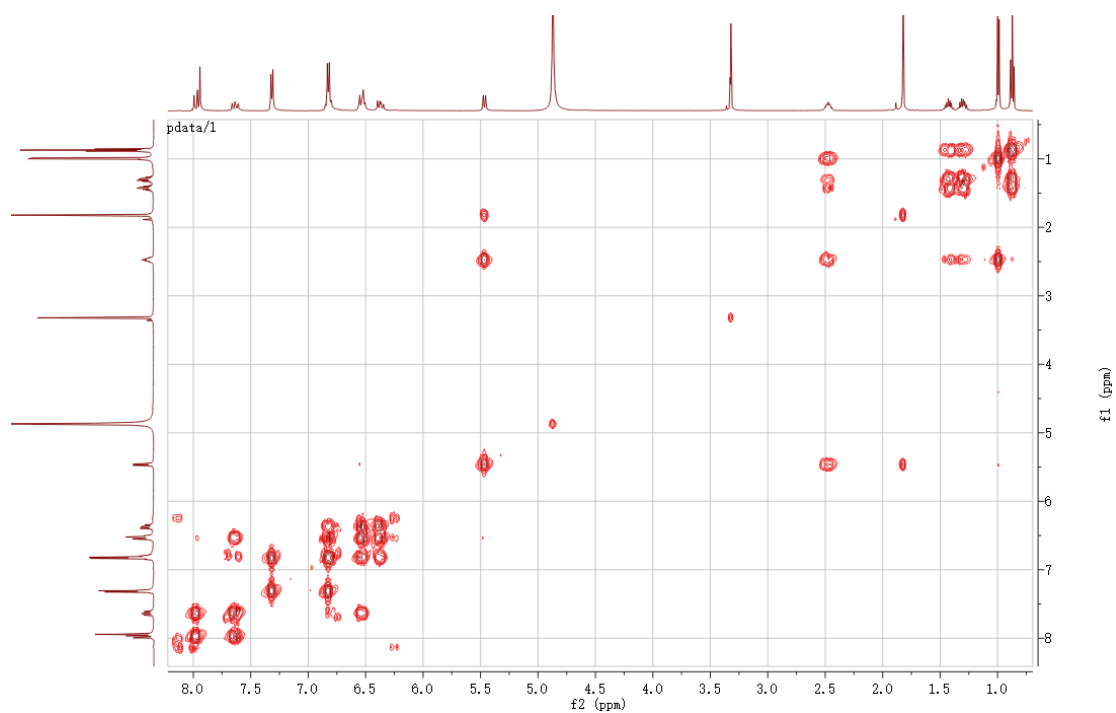

$^1\text{H}-^1\text{H}$  COSY spectrum of **Farinosone B** (500 Hz,  $\text{CD}_3\text{OD}-d_4$ ).

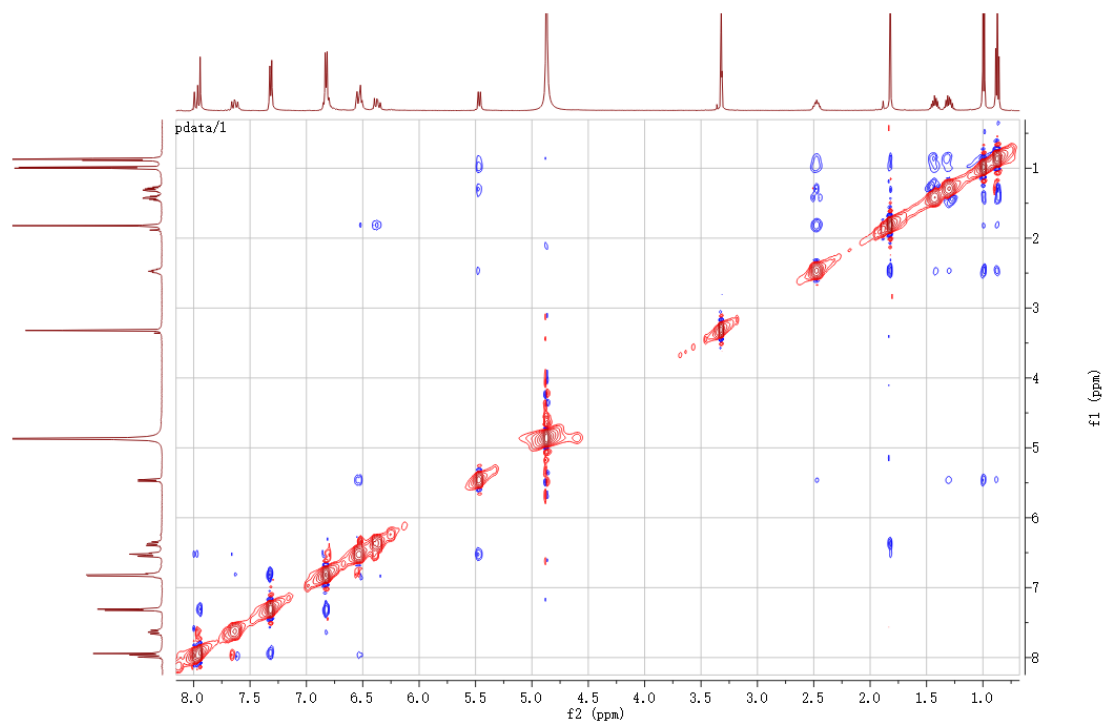

$^1\text{H}$ - $^1\text{H}$  NOESY spectrum of **Farinosone B** (500 Hz,  $\text{CD}_3\text{OD}-d_4$ ).
