# Supplementary material for: Inductive Production of the Iron-Chelating 2-Pyridones Benefits the Producing Fungus To Compete for Diverse Niches
Source: PubMed Central journal article supplement (PMC8669486; doi:10.1128/mbio.03279-21), 2021-12-14
Supplement: mbio.03279-21-st001.pdf [file mbio.03279-21-st001.pdf]

**TABLE S1** Conserved gene clusters involved in biosynthesis of 2-pyridones in different fungi.

| <i>B. bassiana</i>     | <i>B. brongniartii</i> | <i>C. militaris</i>    | <i>I. fumosorosea</i>   | <i>A. nidulans</i>  | Annotation                                |
|------------------------|------------------------|------------------------|-------------------------|---------------------|-------------------------------------------|
| BBA_07334, <i>tenR</i> | BBO_05972              | CCM_08264, <i>farR</i> | ISF_08694, <i>fumoR</i> | AN8414, <i>apdR</i> | Fungal zinc cluster transcription factor  |
| BBA_07335, <i>tenA</i> | BBO_05971              | CCM_08263, <i>farA</i> | ISF_08693, <i>fumoA</i> | AN8411, <i>apdE</i> | Cytochrome P450 CYP655C1                  |
| BBA_07336, <i>tenB</i> | BBO_05970              | CCM_08262, <i>farB</i> | ISF_08692, <i>fumoB</i> | AN8408, <i>apdB</i> | Cytochrome P450 CYP623C1                  |
| BBA_07337, <i>tenC</i> | BBO_05969              | CCM_08262, <i>farC</i> | ISF_08691, <i>fumoC</i> | AN8409, <i>apdC</i> | Enoyl reductase                           |
| BBA_07338, <i>tenS</i> | BBO_05968              | CCM_08261, <i>farS</i> | ISF_08690, <i>fumoS</i> | AN8412, <i>apdA</i> | PKS-NRPS synthase                         |
| BBA_07339              | BBO_05967              | CCM_08260              | ISF_08689               | –                   | Putative Zn(II)2Cys6 transcription factor |
| –                      | –                      | –                      | –                       | AN8413, <i>adpF</i> | Aspyridones efflux protein                |
| –                      | –                      | –                      | –                       | AN8415, <i>apdG</i> | Acyl-CoA dehydrogenase                    |
