# Supplementary material for: Inductive Production of the Iron-Chelating 2-Pyridones Benefits the Producing Fungus To Compete for Diverse Niches
Source: PubMed Central journal article supplement (PMC8669486; doi:10.1128/mbio.03279-21), 2021-12-14
Supplement: mbio.03279-21-st002.pdf [file mbio.03279-21-st002.pdf]

**TABLE S2** PCR primers used in this study.

| Mutants                                  | Primers<br>* | Primer sequences                               | RE**         | Note                                  |                                 |
|------------------------------------------|--------------|------------------------------------------------|--------------|---------------------------------------|---------------------------------|
| <i>Beauveria bassiana</i>                |              |                                                |              |                                       |                                 |
| OE:: <i>BBA_07334</i><br>( <i>tenR</i> ) | Uf           | TCAATAACAAC TAGTTCTAGAATGGAGCCCGGCC<br>CGGCG   | <i>XbaI</i>  | Overexpression of<br><i>tenR</i>      |                                 |
|                                          | Ur           | CGCGGTGGCGGCCGCTCTAGATCACAGCGGCAG<br>GCCTAC    |              |                                       |                                 |
| OE:: <i>BBA_07339</i>                    | Uf           | TCAATAACAAC TAGTTCTAGAATGGAAACAACG<br>GTCAAGGC | <i>XbaI</i>  | Overexpression of<br><i>BBA_07339</i> |                                 |
|                                          | Ur           | CGCGGTGGCGGCCGCTCTAGATCATTCTGTCGATT<br>GAAACAT |              |                                       |                                 |
| <i>ΔtenS</i>                             | Uf           | CTGCAGCCCGGGGGATCCTCTTATTTCTAGGGTA<br>GGCG     | <i>BamHI</i> | Gene deletion                         |                                 |
|                                          | Ur           | ATCTTCTGTCGACGGATCATTGGGACAAGGCGTT<br>CA       |              |                                       |                                 |
|                                          | Df           | CGAGATCTGATGAAAAACGGCAGGTATTCCACT              | <i>SpeI</i>  |                                       |                                 |
|                                          | Dr           | GGCCGCTCTAGAACTAGTTCTACGGTTCGCCACA<br>AA       |              |                                       |                                 |
|                                          | F            | GGAGACAGTTCTGCCGACTT                           | /            |                                       | Deletion mutant<br>verification |
|                                          | R            | ATGCGATTGGAGATGATGC                            |              |                                       |                                 |
| OE:: <i>tenRΔtenS</i>                    | Uf           | CTGCAGCCCGGGGGATCCTCTTATTTCTAGGGTA<br>GGCG     | <i>BamHI</i> | Gene deletion                         |                                 |
|                                          | Ur           | ATCTTCTGTCGACGGATCATTGGGACAAGGCGTT<br>CA       |              |                                       |                                 |
|                                          | Df           | CGAGATCTGATGAAAAACGGCAGGTATTCCACT              | <i>SpeI</i>  |                                       |                                 |
|                                          | Dr           | GGCCGCTCTAGAACTAGTTCTACGGTTCGCCACA<br>AA       |              |                                       |                                 |
|                                          | F            | GGAGACAGTTCTGCCGACTT                           | /            |                                       | Deletion mutant<br>verification |
|                                          | R            | ATGCGATTGGAGATGATGC                            |              |                                       |                                 |
| OE:: <i>tenRΔtenA</i>                    | Uf           | CTGCAGCCCGGGGGATCCTTTGTCAACTTTCGTA<br>ATCC     | <i>BamHI</i> | Gene deletion                         |                                 |
|                                          | Ur           | ATCTTCTGTCGACGGATCGGTCTCAAGTCTGCCT<br>CA       |              |                                       |                                 |
|                                          | Df           | CGAGATCTGATGAATCCAGTCGTCGCCATCAC               | <i>SpeI</i>  |                                       |                                 |
|                                          | Dr           | GGCCGCTCTAGAACTAGTTAAACCAACGCCATTA<br>CC       |              |                                       |                                 |
|                                          | F            | TTTGCCGTTTGGTCTCTCC                            | /            |                                       | Deletion mutant<br>verification |
|                                          | R            | CCTCCATACCTTATCCTGT                            |              |                                       |                                 |
| OE:: <i>tenRΔtenB</i>                    | Uf           | CTGCAGCCCGGGGGATCCGAACGGCGAGTCACA<br>ACA       | <i>BamHI</i> | Gene deletion                         |                                 |
|                                          | Ur           | ATCTTCTGTCGACGGATCCGGGAAATGGGAGGG<br>TAG       |              |                                       |                                 |
|                                          | Df           | CGAGATCTGATGAAAGGCAACAAGCCGATTTA               | <i>SpeI</i>  |                                       |                                 |
|                                          | Dr           | GGCCGCTCTAGAACTAGTCCAGCCAAGGTCGTA<br>GTG       |              |                                       |                                 |

|                                     |       |                                                |       |                              |                              |
|-------------------------------------|-------|------------------------------------------------|-------|------------------------------|------------------------------|
|                                     | F     | TGGAACGGCGAGTCACAA                             | /     | Deletion mutant verification |                              |
|                                     | R     | GAGACGCATCGCTTACG                              |       |                              |                              |
| OE::tenRΔBbGT1                      | Uf    | CTGCAGCCCGGGGGATCCCCATTTGTTCCCGTAA<br>GT       | BamHI | Gene deletion                |                              |
|                                     | Ur    | ATCTTCTGTGCGACGGATCTCAACCATTCTCGCTTT<br>T      |       |                              |                              |
|                                     | Df    | CGAGATCTGATGAAGACCAACTTCTTGTCCCTG              | SpeI  |                              |                              |
|                                     | Dr    | GGCCGCTCTAGAAGTAGTACCTTTATCGCCTGCT<br>GT       |       |                              |                              |
|                                     | F     | CTCGTCATCTAAACCTCG                             | /     |                              | Deletion mutant verification |
|                                     | R     | CATAGCCAGCGTTCAAAA                             |       |                              |                              |
| OE::tenRΔBbMT1                      | Uf    | CTGCAGCCCGGGGGATCC<br>TGATTGAAGGGCGAGGAA       | BamHI | Gene deletion                |                              |
|                                     | Ur    | ATCTTCTGTGCGACGGATC<br>GCATCTGCGGGTAGAACG      |       |                              |                              |
|                                     | Df    | CGAGATCTGATGAA TATCCAGTCACCTGCCCTAG            | SpeI  |                              |                              |
|                                     | Dr    | GGCCGCTCTAGAAGTAGT<br>ACCGACCCTGAACGAAAT       |       |                              |                              |
|                                     | F     | TCGGTCTTCGGACATTTA                             | /     |                              | Deletion mutant verification |
|                                     | R     | CCATTTGTTCCCGTAAAGT                            |       |                              |                              |
| OE::tenRΔBbGT1<br>/MT1              | Uf    | CTGCAGCCCGGGGGATCCTTGTCTGCCACATTT<br>TG        | BamHI | Gene deletion                |                              |
|                                     | Ur    | ATCTTCTGTGCGACGGATCCGACCAACTTCTTGTC<br>CCT     |       |                              |                              |
|                                     | Df    | CGAGATCTGATGAATGTTACGAGGTTTAGATGAC<br>G        | SpeI  |                              |                              |
|                                     | Dr    | GGCCGCTCTAGAAGTAGTGCAACTGCCTGGATAC<br>TTT      |       |                              |                              |
|                                     | F     | CGCCCTAGTAGATCAATCC                            | /     |                              | Deletion mutant verification |
|                                     | R     | CACCACTGGCTGAGTATGT                            |       |                              |                              |
| OE::tenRΔBbGT2/<br>MT2              | Uf    | TCATCTTCTGTGCGAC<br>AACCCTCAATACACCAACCT       | PstI  | Gene deletion                |                              |
|                                     | Ur    | TTGATATCGAATTCC CAGAAGCCCTCTACACCC             |       |                              |                              |
|                                     | Df    | CCGCTCTAGAAGTAG GAGCCCTACCAGCTATGA             | SpeI  |                              |                              |
|                                     | Dr    | GTCACCGAGATCTGA<br>GAAGGTCCTCAACTACTATG        |       |                              |                              |
|                                     | F     | ACTGGCATCTTCTTAGGGC                            | /     |                              | Deletion mutant verification |
|                                     | R     | GGACATTGTGGGAAACTCG                            |       |                              |                              |
| <i>tubulin</i>                      | Tub-F | GAGATTGTGAGTGCTCCTACC                          | /     | RT-PCR reference             |                              |
|                                     | Tub-R | CCCTTAGCCCAGTTGTTA                             |       |                              |                              |
| <b><i>Metarhizium robertsii</i></b> |       |                                                |       |                              |                              |
| ΔMrGT1                              | Uf    | GCTTGATATCGAATTCCTGCAGTCGCCTAAAGAT<br>GCTGGG   | PstI  | Gene deletion                |                              |
|                                     | Ur    | CAATATCATCTTCTGTGCGACTGTTTGTAACCTGA<br>GACGGCC |       |                              |                              |

|                                 |    |                                                    |              |                                                                     |                              |
|---------------------------------|----|----------------------------------------------------|--------------|---------------------------------------------------------------------|------------------------------|
|                                 | Df | GTCACCGAGATCTGATCCTTCCACTCATAACCTAGCTAG            |              |                                                                     |                              |
|                                 | Dr | AAGGGAACAAAAGCTGGAGGCAAGAAGGGTTTC                  |              |                                                                     |                              |
|                                 | F  | TTCACGTAAGTGGCAGGCAA                               | /            | Deletion mutant verification                                        |                              |
|                                 | R  | ATCTCGCCACTTCGCTCTTC                               |              |                                                                     |                              |
| <i>ΔMrMT1</i>                   | Uf | GCTTGATATCGAATTCCTGCAGTCCTTCCACTCA<br>TAACCTAGCTAG | <i>BamHI</i> | Gene deletion                                                       |                              |
|                                 | Ur | TCATCTTCTGTGCGACAGGCAAGAAGGGTTCCAG                 |              |                                                                     |                              |
|                                 | Df | ACCGAGATCTGATGAAGTGTGAGATGGCTGCT<br>CTCAGC         | <i>XbaI</i>  |                                                                     |                              |
|                                 | Dr | AGGGAACAAAAGCTGACTAGTTGCAGATCTCGA<br>CCGTCAC       |              |                                                                     |                              |
|                                 | F  | ACCCCTGAAGCGTCCATC                                 | /            |                                                                     | Deletion mutant verification |
|                                 | R  | AAGGGCGAAGTGTCTCC                                  |              |                                                                     |                              |
| <i>Saccharomyces cerevisiae</i> |    |                                                    |              |                                                                     |                              |
| <i>BbGT1 (Leu-)</i>             | F  | TGACGACAAGCTTCATATGTCTCCGTCACGCAGC<br>GAG          | <i>NdeI</i>  | Plasmid modification by including the both auxotrophic marker genes |                              |
|                                 | R  | TGGTGATGTCCGTTTAAACTCAATCCATAGCCGC<br>CCACTTGAG    | <i>PmeI</i>  |                                                                     |                              |
| <i>BbMT1 (Trp-)</i>             | F  | TGACGACAAGCTTCATATGGCTCTCGTCGAAAAA<br>ATTCAGT      | <i>NdeI</i>  |                                                                     |                              |
|                                 | R  | TGGTGATGTCCGTTTAAACTCAGTTTCTTTTGGC<br>ATCAACATGT   | <i>PmeI</i>  |                                                                     |                              |

\*, Uf and Ur represent the forward and reverse primers for amplification of the upstream (5'-flanking) region for each target gene; Df and Dr represent the forward and reverse primers for amplification of the downstream (3'-flanking) region for each target gene; \*\*, RE, restriction enzymes.
